# Supplementary material for: SHOX2 is a Potent Independent Biomarker to Predict Survival of WHO Grade II–III Diffuse Gliomas
Source: PubMed Central journal article supplement — eBioMedicine. 2016 Oct 28;13:80–9. doi: 10.1016/j.ebiom.2016.10.040 (PMC5264450; doi:10.1016/j.ebiom.2016.10.040), 2016-10-28
Supplement: mmc1.pdf [file mmc1.pdf]

## Appendix

## In:

### ***SHOX2* is a Potent Independent Biomarker to Predict Survival of WHO Grade II-III Diffuse Gliomas**

Yu-An Zhang<sup>a,i,1</sup>, Yunyun Zhou,<sup>b,c,1</sup> Xin Luo<sup>d</sup>, Kai Song<sup>e</sup>, Xiaotu Ma<sup>f</sup>, Adwait Sathe<sup>g</sup>, Luc Girard<sup>a</sup>, Guanghua Xiao<sup>b,d,h</sup>, Adi F Gazdar<sup>a,h,i,\*</sup>

<sup>a</sup>The Hamon Center for Therapeutic Oncology Research, University of Texas Southwestern Medical Center, Dallas, TX 75390, USA

<sup>b</sup>Department of Clinical Sciences, University of Texas Southwestern Medical Center, Dallas, TX 75390, USA

<sup>c</sup>Center of Biostatistics and Bioinformatics, University of Mississippi Medical Center, Jackson, MS 39216, USA

<sup>d</sup>Department of Bioinformatics, University of Texas Southwestern Medical Center, Dallas, TX 75390, USA

<sup>e</sup>School of Chemical Engineering and Technology, Tianjin University, Tianjin 300072, China

<sup>f</sup>Department of Computational Biology, St Jude Children's Research Hospital, 262 Danny Thomas Place, Memphis, TN, USA

<sup>g</sup>The Center for Systems Biology, Department of Molecular and Cell Biology, The University of Texas at Dallas, Richardson, TX, 75080, USA

<sup>h</sup>The Simmons Comprehensive Cancer Center; University of Texas Southwestern Medical Center, Dallas, TX 75390, USA

<sup>i</sup>Department of Pathology, University of Texas Southwestern Medical Center, Dallas, TX 75390, USA

<sup>1</sup>These authors contributed equally.

\* Corresponding Author

#### **Adi F Gazdar**

Hamon Center for Therapeutic Oncology  
The University of Texas Southwestern Medical Center  
6000 Harry Hines Blvd  
Dallas, TX 75390-8593  
USA  
(fax) 214-648-4940  
(phone) 214-648-4921  
Email: adi.gazdar@utsouthwestern.edu

## Notes on Datasets Acquisitions and Constructions

All publically available methylation and expression datasets used in this study were described in Appendix Table S1. The original beta values of samples were used in all 450K methylation datasets constructed. The values of the RNA rsem.genes.normalized raw data were used and transformed by  $\log_2$  [RNA Seq V2 RSEM (Log2)] in the TCGA LGG and GBM datasets constructed. To avoid any bias, the cases with multiple data entries or from recurrent tumors were excluded from further analyses in the TCGA datasets.

For GSE16011 and REMBRANDT datasets, the raw data of Affymetrix GeneChip Human Genome U133 Plus 2.0 [HG-U133\_Plus\_2] microarray were downloaded on the dates as described in Table S1, and processed by us into MAS5.0 and quantile normalized expression levels, using MATRIX 1.508 program. Among three probes (probe 210135\_s\_at, 208443\_x\_at, 210134\_s\_at) detecting *SHOX2* mRNA expressions, *SHOX2* mRNA probe\_210135\_s\_at had the highest specificity and the highest detection signal intensity overall (see GSE16011 dataset) (GeneCards: <http://genecards.weizmann.ac.il/geneannot/index.shtml>, accession date on March 9 2016). Thus *SHOX2* mRNA probe\_210135\_s\_at was selected and represented in survival analysis of *SHOX2* marker.

**Table S1.** Lists of datasets<sup>a</sup>.

| ID of Dataset    | Source       | Type of Tissues     | No. of Cases                            | Data Types                                  | Latest Date of Accession | Accession link                                                                                                                      | Source for Clinical and Markers Data | Ref. |
|------------------|--------------|---------------------|-----------------------------------------|---------------------------------------------|--------------------------|-------------------------------------------------------------------------------------------------------------------------------------|--------------------------------------|------|
| GSE53162         | NCBI-GEO     | Non-M brain         | Non-M n=40                              | Illumina 45K microarray                     | Dec 14 2015              | <a href="http://www.ncbi.nlm.nih.gov/geo/query/acc.cgi?acc=GSE53162">http://www.ncbi.nlm.nih.gov/geo/query/acc.cgi?acc=GSE53162</a> | NCBI-GEO                             | 1    |
| GSE41826         | NCBI-GEO     | Non-M brain         | Non-M (bulk) n=20                       | Illumina 45K microarray                     | Dec 2 2015               | <a href="http://www.ncbi.nlm.nih.gov/geo/query/acc.cgi?acc=GSE41826">http://www.ncbi.nlm.nih.gov/geo/query/acc.cgi?acc=GSE41826</a> | NCBI-GEO                             | 2    |
| TCGA LGG and GBM | TCGA         | Non-M brain         | Non-M n=4                               | Illumina 45K microarray                     | Nov 9 2014               | <a href="https://tcga-data.nci.nih.gov/docs/publications/tcga/">https://tcga-data.nci.nih.gov/docs/publications/tcga/</a>           | TCGA                                 |      |
| GSE44684         | NCBI-GEO     | Non-M brain         | Non-M n=2 (adult)                       | Illumina 45K microarray                     | Nov 11 2015              | <a href="http://www.ncbi.nlm.nih.gov/geo/query/acc.cgi?acc=GSE44684">http://www.ncbi.nlm.nih.gov/geo/query/acc.cgi?acc=GSE44684</a> | NCBI-GEO                             |      |
| GSE44684         | NCBI-GEO     | PA                  | PA n=61                                 | Illumina 45K microarray                     | Nov 11 2015              | <a href="http://www.ncbi.nlm.nih.gov/geo/query/acc.cgi?acc=GSE44684">http://www.ncbi.nlm.nih.gov/geo/query/acc.cgi?acc=GSE44684</a> | NCBI-GEO                             | 3    |
| TCGA LGG         | TGCA         | LGG                 | LGG n=516                               | Illumina 45K microarray                     | Nov 9 2014               | <a href="https://tcga-data.nci.nih.gov/docs/publications/tcga/">https://tcga-data.nci.nih.gov/docs/publications/tcga/</a>           | TCGA and ref. on the right           | 4    |
|                  |              |                     |                                         | RNA-Seq                                     | Feb 23 2016              | <a href="https://tcga-data.nci.nih.gov/docs/publications/tcga/">https://tcga-data.nci.nih.gov/docs/publications/tcga/</a>           | TCGA and ref. on the right           | 4    |
| TCGA GBM         | TGCA         | GBM                 | GBM n=129                               | Illumina 45K microarray                     | Nov 6 2014               | <a href="https://tcga-data.nci.nih.gov/docs/publications/tcga/">https://tcga-data.nci.nih.gov/docs/publications/tcga/</a>           | TCGA and ref. on the right           | 4    |
|                  |              |                     |                                         | RNA-Seq                                     | April 6 2016             | <a href="https://tcga-data.nci.nih.gov/docs/publications/tcga/">https://tcga-data.nci.nih.gov/docs/publications/tcga/</a>           | TCGA and ref. on the right           | 4    |
| GSE16011         | NCBI-GEO     | Non-M, PA, LGG, GBM | Non-M n=8; PA n=8; LGG n=109; GBM n=159 | Affymetrix Human Genome U133 Plus 2.0 Array | March 31 2016            | <a href="http://www.ncbi.nlm.nih.gov/geo/query/acc.cgi?acc=GSE16011">http://www.ncbi.nlm.nih.gov/geo/query/acc.cgi?acc=GSE16011</a> | NCBI-GEO and Ref. on the right       | 5    |
| GSE30336         | NCBI-GEO     | LGG, other          | LGG n=48; other/non-glioma: n=4         | Affymetrix Human Genome U133 Plus 2.0 Array | March 8 2016             | <a href="http://www.ncbi.nlm.nih.gov/geo/query/acc.cgi?acc=GSE30336">http://www.ncbi.nlm.nih.gov/geo/query/acc.cgi?acc=GSE30336</a> | NCBI-GEO and Ref. on the right       | 4, 6 |
| GSE30338         | NCBI-GEO     | LGG, GBM, other     | LGG n=68; GBM=9; other/non-glioma: n=4  | Illumina 45K microarray                     | March 2 2016             | <a href="http://www.ncbi.nlm.nih.gov/geo/query/acc.cgi?acc=GSE30338">http://www.ncbi.nlm.nih.gov/geo/query/acc.cgi?acc=GSE30338</a> | NCBI-GEO and Ref. on the right       | 4, 6 |
| REMBRANDT        | ArrayExpress | Non-M, LGG, GBM     | Non-M n=14; LGG n=151; GBM =178         | Affymetrix Human Genome U133 Plus 2.0 Array | March 26 2016            | <a href="http://www.ebi.ac.uk/arrayexpress/experiments/E-MTAB-3073/">http://www.ebi.ac.uk/arrayexpress/experiments/E-MTAB-3073/</a> | NCI REMBRANDT, GSE55918, E-MTAB-3073 |      |

|          |          |          |                     |                                                                    |               |                                                                                                                                                                                                                               |                   |      |
|----------|----------|----------|---------------------|--------------------------------------------------------------------|---------------|-------------------------------------------------------------------------------------------------------------------------------------------------------------------------------------------------------------------------------|-------------------|------|
| GSE43378 | NCBI-GEO | LGG, GBM | LGG n=18;<br>GBM=32 | Affymetrix Human Genome U133 Plus 2.0 Array and Clinical Variables | March 21 2016 | <a href="http://www.ncbi.nlm.nih.gov/geo/query/acc.cgi?target=self&amp;form=html&amp;view=quick&amp;acc=GSE43378">http://www.ncbi.nlm.nih.gov/geo/query/acc.cgi?target=self&amp;form=html&amp;view=quick&amp;acc=GSE43378</a> | NCBI-GEO          | 7    |
| GSE58218 | NCBI-GEO | LGG      | LGG n=228           | Illumina 45K microarray                                            | Jan 19 2016   | <a href="http://www.ncbi.nlm.nih.gov/geo/query/acc.cgi?acc=GSE58218">http://www.ncbi.nlm.nih.gov/geo/query/acc.cgi?acc=GSE58218</a>                                                                                           | NCBI-GEO          | 8    |
| GSE61160 | NCBI-GEO | LGG      | LGG n=46            | Illumina 45K microarray                                            | March 20 2016 | <a href="http://www.ncbi.nlm.nih.gov/geo/query/acc.cgi?acc=GSE61160">http://www.ncbi.nlm.nih.gov/geo/query/acc.cgi?acc=GSE61160</a>                                                                                           | Ref. on the right | 4, 9 |

Notes: <sup>a</sup>The additional information for the datasets used in this study can be available upon requests.

1. Non-M: non-malignant; PA: pilocytic astrocytomas; LGG: lower-grade gliomas; GBM: glioblastomas.
2. Illumina 450K microarray: Illumina HumanMethylation450 BeadChip array
3. REMBRANDT dataset was constructed from the following source: (1) NCI REMBRANDT study, <https://wiki.nci.nih.gov/display/caIntegrator/caIntegrator+Directory> (Access date: march 31, 2016); (2) REMBRANDT Project Betastasis, <http://www.betastasis.com/glioma/rembrandt/> (access date: march 14, 2016); (3) GEO GSE55918: <http://www.ncbi.nlm.nih.gov/geo/query/acc.cgi?acc=GSE55918> (access date: march 21, 2016) ; (4)E-MTAB-3073 – Molecular Analysis of Brain Neoplasia, ArrayExpress, <http://www.ebi.ac.uk/arrayexpress/experiments/E-MTAB-3073/> (access date: march 26, 2016).
4. GSE16011 dataset (Gravendeel L.A.M et al) from the study of glioma samples which were collected from the Erasmus University Medical Center tumor archive ( $n = 276$ ) from patients (1989–2005), Rotterdam, Netherlands;
5. GSE58218 dataset (Wiestler B et al) from the study of primary tumor samples of anaplastic gliomas for DNA methylation analysis ( $n = 228$ ), which were collected at the Heidelberg University Hospital (Heidelberg, Germany,  $n = 113$ ) and from the NOA-04 trial ( $n = 115$ ).
6. GSE61160 dataset: 24 out of 46 LGG cases with clinical information available.

## References for Table S1

1. Ladd-Acosta C, Hansen KD, Briem E. et al *Molecular psychiatry* 2014; 19(8): 862-71.
2. Guintivano J, Aryee MJ, Kaminsky ZA. *Epigenetics* 2013; 8(3): 290-302.
3. Lambert SR, Witt H, Hovestadt V, et al. *Acta neuropathologica* 2013; 126(2): 291-301.
4. Ceccarelli M, Barthel FP, Malta TM, et al. *Cell* 2016; 164(3): 550-63.
5. Gravendeel LA, Kouwenhoven MC, Gevaert O, et al. *Cancer research* 2009; 69(23): 9065-72.
6. Turcan S, Rohle D, Goenka A, et al. *Nature* 2012; 483(7390): 479-83.
7. Kawaguchi A, Yajima N, Tsuchiya N, et al. *Cancer Sci* 2013; 104(9): 1205-10.
8. Wiestler B, Capper D, Sill M, et al. *Acta neuropathologica* 2014; 128(4): 561-71.
9. Mur P, Mollejo M, Ruano Y, et al. *Acta neuropathologica* 2013; 126(2): 277-89.

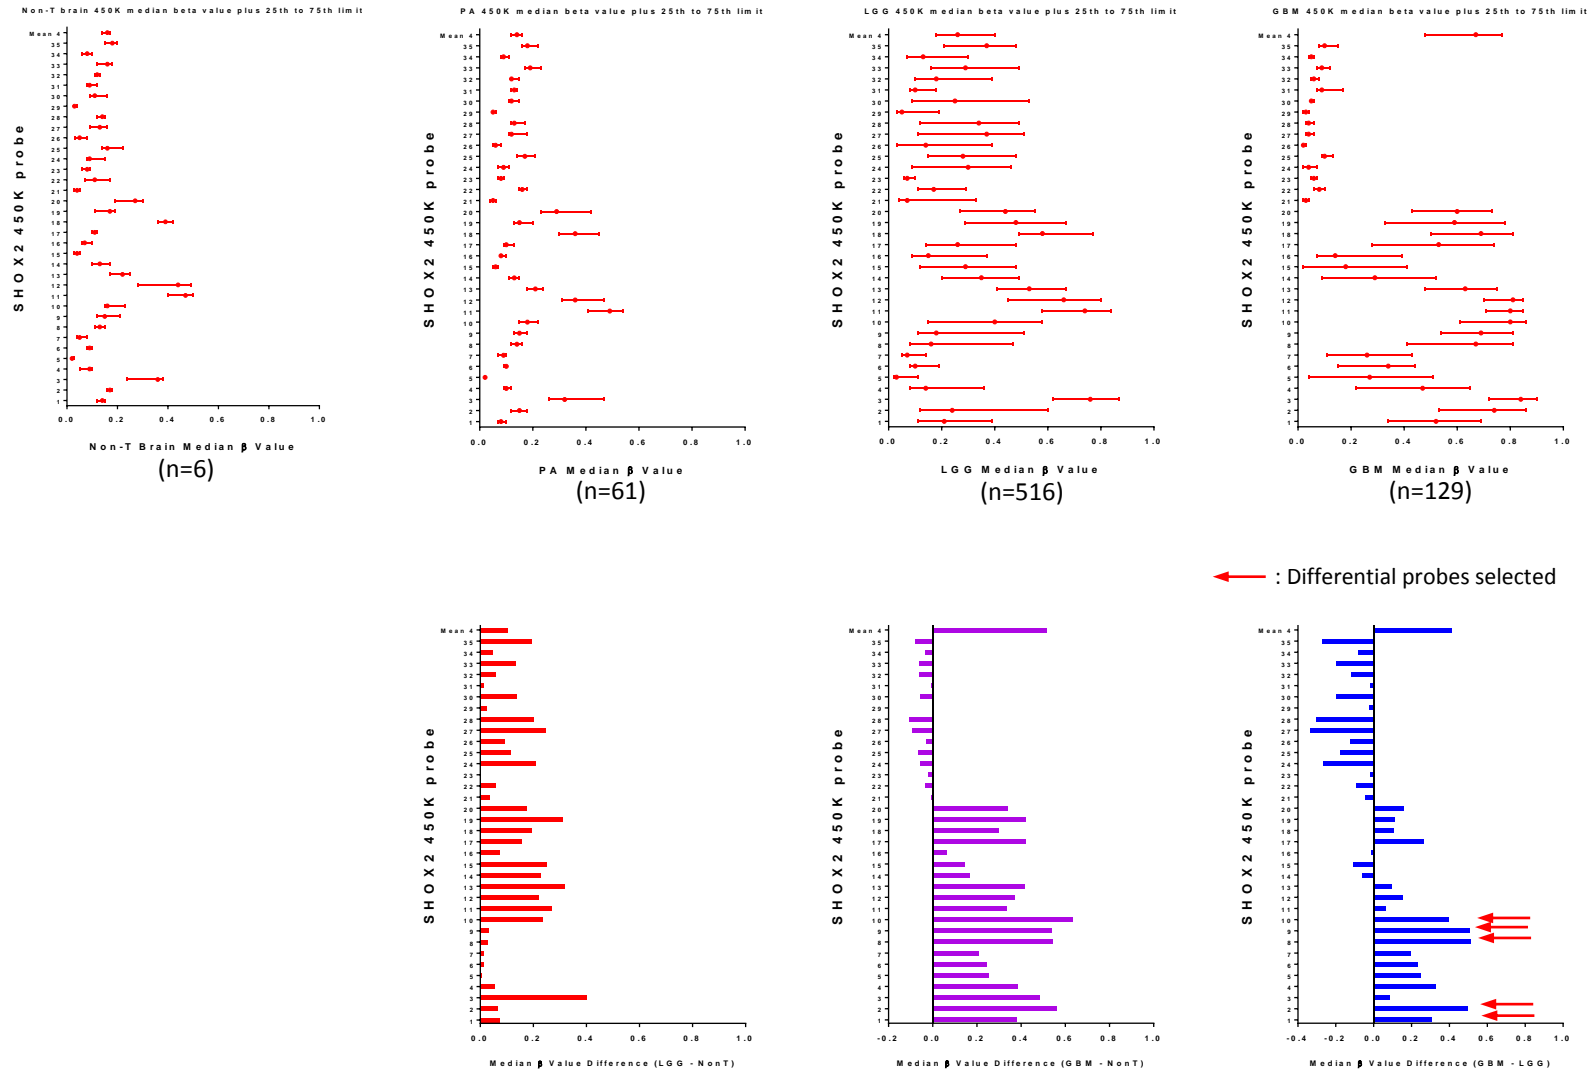

**Figure S1.** Identifying the highly differential methylation regions in *SHOX2* gene between LGG and GBM through analyses of the 450K methylation datasets. See Appendix Tables S1 and S2 for data source and 450K probe numbers designated and their original array ID. Non-M: non-malignant brain tissues; PA: pilocytic astrocytomas; LGG: lower grade gliomas; GBM: glioblastomas. Bars and lines (upper panel): median and interquartile range.

**Table S2A.** Part I: Analyses and comparison of *SHOX2* methylations in TCGA LGG and GBM 450K methylation datasets and pilocytic astrocytoma (PA) and non-malignant (Non-M) brain tissues.

| Pro<br>be<br>No. | SHOX2<br>450K<br>probe ID | LGG (n=516)       |        |      |      | GBM (n=129)       |        |      |      | PA (n=61)         |        |      |      | Non-M brain (n=6) |        |      |      |
|------------------|---------------------------|-------------------|--------|------|------|-------------------|--------|------|------|-------------------|--------|------|------|-------------------|--------|------|------|
|                  |                           | No. of<br>samples | Median | Mean | Std  | No. of<br>samples | Median | Mean | Std  | No. of<br>samples | Median | Mean | Std  | no. of<br>samples | Median | Mean | Std  |
| 1                | cg25506747                | 513               | 0.21   | 0.28 | 0.20 | 128               | 0.52   | 0.51 | 0.22 | 60                | 0.08   | 0.09 | 0.04 | 6.00              | 0.14   | 0.15 | 0.05 |
| 2                | cg21552242                | 516               | 0.24   | 0.36 | 0.26 | 129               | 0.74   | 0.67 | 0.23 | 61                | 0.15   | 0.16 | 0.07 | 6.00              | 0.17   | 0.17 | 0.04 |
| 3                | cg12315391                | 516               | 0.76   | 0.72 | 0.17 | 129               | 0.84   | 0.79 | 0.14 | 61                | 0.32   | 0.36 | 0.13 | 6.00              | 0.36   | 0.32 | 0.16 |
| 4                | cg03458172                | 516               | 0.14   | 0.24 | 0.20 | 129               | 0.47   | 0.45 | 0.26 | 61                | 0.10   | 0.11 | 0.04 | 6.00              | 0.09   | 0.08 | 0.04 |
| 5                | cg05401764                | 516               | 0.03   | 0.11 | 0.17 | 129               | 0.27   | 0.32 | 0.27 | 60                | 0.02   | 0.02 | 0.01 | 6.00              | 0.02   | 0.02 | 0.01 |
| 6                | cg09095222                | 516               | 0.10   | 0.16 | 0.12 | 129               | 0.34   | 0.32 | 0.17 | 61                | 0.10   | 0.10 | 0.01 | 6.00              | 0.09   | 0.09 | 0.02 |
| 7                | cg00089486                | 516               | 0.07   | 0.13 | 0.13 | 129               | 0.26   | 0.29 | 0.20 | 61                | 0.09   | 0.08 | 0.02 | 6.00              | 0.05   | 0.06 | 0.03 |
| 8                | cg21437028                | 516               | 0.16   | 0.28 | 0.24 | 129               | 0.67   | 0.59 | 0.26 | 61                | 0.14   | 0.16 | 0.08 | 6.00              | 0.13   | 0.13 | 0.03 |
| 9                | cg21847036                | 515               | 0.18   | 0.31 | 0.25 | 129               | 0.69   | 0.65 | 0.21 | 61                | 0.15   | 0.17 | 0.07 | 6.00              | 0.15   | 0.16 | 0.05 |
| 10               | cg15726154                | 516               | 0.40   | 0.40 | 0.26 | 129               | 0.80   | 0.71 | 0.21 | 61                | 0.18   | 0.21 | 0.09 | 6.00              | 0.16   | 0.18 | 0.06 |
| 11               | cg00010946                | 516               | 0.74   | 0.71 | 0.15 | 129               | 0.80   | 0.77 | 0.12 | 61                | 0.49   | 0.48 | 0.10 | 6.00              | 0.47   | 0.44 | 0.07 |
| 12               | cg17619405                | 516               | 0.66   | 0.61 | 0.22 | 129               | 0.81   | 0.76 | 0.14 | 61                | 0.36   | 0.39 | 0.12 | 6.00              | 0.44   | 0.40 | 0.14 |
| 13               | cg18194945                | 516               | 0.53   | 0.54 | 0.18 | 129               | 0.63   | 0.59 | 0.21 | 61                | 0.21   | 0.23 | 0.07 | 6.00              | 0.22   | 0.22 | 0.06 |
| 14               | cg04521004                | 516               | 0.35   | 0.36 | 0.18 | 129               | 0.29   | 0.31 | 0.22 | 61                | 0.13   | 0.15 | 0.07 | 6.00              | 0.13   | 0.15 | 0.08 |
| 15               | cg12993163                | 516               | 0.29   | 0.32 | 0.23 | 129               | 0.18   | 0.24 | 0.24 | 61                | 0.06   | 0.07 | 0.03 | 6.00              | 0.04   | 0.04 | 0.02 |
| 16               | cg09542210                | 516               | 0.15   | 0.25 | 0.22 | 129               | 0.14   | 0.26 | 0.24 | 61                | 0.08   | 0.09 | 0.01 | 6.00              | 0.07   | 0.08 | 0.02 |
| 17               | cg20501518                | 516               | 0.26   | 0.32 | 0.21 | 129               | 0.53   | 0.51 | 0.26 | 61                | 0.10   | 0.12 | 0.04 | 6.00              | 0.11   | 0.11 | 0.03 |
| 18               | cg05512327                | 516               | 0.58   | 0.61 | 0.17 | 129               | 0.69   | 0.65 | 0.20 | 61                | 0.36   | 0.38 | 0.11 | 6.00              | 0.39   | 0.40 | 0.05 |
| 19               | cg04913979                | 516               | 0.48   | 0.48 | 0.24 | 129               | 0.59   | 0.55 | 0.27 | 61                | 0.15   | 0.19 | 0.10 | 6.00              | 0.17   | 0.15 | 0.06 |
| 20               | cg09220088                | 516               | 0.44   | 0.43 | 0.20 | 129               | 0.60   | 0.56 | 0.21 | 60                | 0.29   | 0.32 | 0.11 | 6.00              | 0.27   | 0.24 | 0.08 |
| 21               | cg01557547                | 516               | 0.07   | 0.21 | 0.25 | 129               | 0.03   | 0.05 | 0.09 | 61                | 0.05   | 0.06 | 0.04 | 6.00              | 0.04   | 0.04 | 0.01 |
| 22               | cg04532033                | 516               | 0.17   | 0.22 | 0.15 | 129               | 0.08   | 0.09 | 0.06 | 61                | 0.16   | 0.16 | 0.03 | 6.00              | 0.11   | 0.12 | 0.07 |
| 23               | cg18899952                | 516               | 0.07   | 0.09 | 0.07 | 129               | 0.06   | 0.07 | 0.05 | 61                | 0.08   | 0.08 | 0.03 | 6.00              | 0.08   | 0.07 | 0.02 |
| 24               | cg16703882                | 516               | 0.30   | 0.29 | 0.19 | 129               | 0.04   | 0.07 | 0.10 | 61                | 0.09   | 0.10 | 0.06 | 6.00              | 0.09   | 0.11 | 0.07 |
| 25               | cg06156376                | 516               | 0.28   | 0.32 | 0.19 | 129               | 0.10   | 0.13 | 0.09 | 61                | 0.17   | 0.18 | 0.06 | 6.00              | 0.16   | 0.18 | 0.06 |
| 26               | cg25977493                | 516               | 0.14   | 0.22 | 0.20 | 129               | 0.02   | 0.04 | 0.07 | 61                | 0.06   | 0.08 | 0.07 | 6.00              | 0.05   | 0.06 | 0.05 |
| 27               | cg26129769                | 516               | 0.37   | 0.35 | 0.23 | 129               | 0.04   | 0.06 | 0.08 | 61                | 0.12   | 0.15 | 0.07 | 6.00              | 0.13   | 0.12 | 0.05 |

|    |                                                                                             |     |      |      |      |     |      |      |      |    |      |      |      |      |      |      |      |
|----|---------------------------------------------------------------------------------------------|-----|------|------|------|-----|------|------|------|----|------|------|------|------|------|------|------|
| 28 | cg25694447                                                                                  | 516 | 0.34 | 0.34 | 0.22 | 129 | 0.04 | 0.06 | 0.07 | 61 | 0.13 | 0.16 | 0.07 | 6.00 | 0.14 | 0.13 | 0.05 |
| 29 | cg14961949                                                                                  | 516 | 0.05 | 0.14 | 0.18 | 129 | 0.03 | 0.05 | 0.07 | 61 | 0.05 | 0.05 | 0.02 | 6.00 | 0.03 | 0.03 | 0.01 |
| 30 | cg17191178                                                                                  | 516 | 0.25 | 0.33 | 0.25 | 129 | 0.05 | 0.08 | 0.10 | 61 | 0.12 | 0.13 | 0.04 | 6.00 | 0.11 | 0.12 | 0.05 |
| 31 | cg15548431                                                                                  | 509 | 0.10 | 0.18 | 0.17 | 129 | 0.09 | 0.13 | 0.10 | 61 | 0.13 | 0.14 | 0.03 | 6.00 | 0.09 | 0.10 | 0.03 |
| 32 | cg21503297                                                                                  | 516 | 0.18 | 0.25 | 0.19 | 129 | 0.06 | 0.08 | 0.07 | 61 | 0.12 | 0.13 | 0.03 | 6.00 | 0.12 | 0.12 | 0.01 |
| 33 | cg25460158                                                                                  | 516 | 0.29 | 0.33 | 0.20 | 129 | 0.09 | 0.11 | 0.09 | 61 | 0.19 | 0.21 | 0.05 | 6.00 | 0.16 | 0.16 | 0.05 |
| 34 | cg00591153                                                                                  | 516 | 0.13 | 0.21 | 0.19 | 129 | 0.05 | 0.06 | 0.05 | 61 | 0.09 | 0.10 | 0.03 | 6.00 | 0.08 | 0.08 | 0.03 |
| 35 | cg24317285                                                                                  | 516 | 0.37 | 0.36 | 0.18 | 129 | 0.10 | 0.13 | 0.10 | 61 | 0.18 | 0.19 | 0.04 | 6.00 | 0.18 | 0.17 | 0.06 |
|    | Mean of 4<br>450K probes<br>(cg25506747,<br>cg21552242,c<br>g21437028<br>and<br>cg21847036) | 516 | 0.26 | 0.31 | 0.18 | 129 | 0.67 | 0.60 | 0.21 | 61 | 0.14 | 0.15 | 0.04 | 6.00 | 0.16 | 0.15 | 0.03 |

**Notes:**

1. See Appendix Table S1 for lists of dataset.
2. The 450K data for non-malignant adult brain samples were from these six samples (TCGA-FG-5963, TCGA-FG-5964, TCGA-74-6573, TCGA-06-AABW from TCGA; GSM1088933, GSM1088934 from GEO), based on availability at time of analyses.

**Table S2B.** Part II: Analyses and comparison of *SHOX2* methylations in TCGA LGG and GBM 450K methylation datasets and pilocytic astrocytoma (PA) and non-malignant (Non-M) brain tissues.

| Probe No. | SHOX2 450K probe ID | Median beta value difference and p values (student t) |              |          |              |                   |                       |          |              |                   |                       |                  |                      |
|-----------|---------------------|-------------------------------------------------------|--------------|----------|--------------|-------------------|-----------------------|----------|--------------|-------------------|-----------------------|------------------|----------------------|
|           |                     | GBM - LGG                                             | p (GBM -LGG) | LGG - PA | p (LGG - PA) | LGG - Non-M Brain | p (LGG - Non-M Brain) | GBM - PA | p (GBM - PA) | GBM - Non-M Brain | p (GBM - Non-M Brain) | PA - Non-M Brain | p (PA - Non-M Brain) |
| 1         | cg25506747          | 0.308                                                 | 5.51E-27     | 0.128    | 3.34E-12     | 0.073             | 1.20E-01              | 0.436    | 7.41E-32     | 0.381             | 1.40E-04              | -0.055           | 2.79E-03             |
| 2         | cg21552242          | 0.494                                                 | 2.09E-30     | 0.089    | 1.66E-08     | 0.067             | 7.46E-02              | 0.583    | 6.60E-39     | 0.561             | 4.59E-07              | -0.022           | 9.53E-01             |
| 3         | cg12315391          | 0.084                                                 | 2.01E-05     | 0.441    | 3.29E-48     | 0.400             | 1.05E-08              | 0.526    | 1.14E-49     | 0.484             | 2.11E-13              | -0.042           | 4.35E-01             |
| 4         | cg03458172          | 0.328                                                 | 1.04E-22     | 0.044    | 7.54E-07     | 0.055             | 5.24E-02              | 0.372    | 9.70E-20     | 0.384             | 6.45E-04              | 0.012            | 7.37E-02             |
| 5         | cg05401764          | 0.247                                                 | 1.47E-25     | 0.006    | 6.03E-05     | 0.005             | 2.12E-01              | 0.253    | 1.57E-15     | 0.252             | 7.15E-03              | -0.001           | 5.31E-01             |
| 6         | cg09095222          | 0.232                                                 | 3.61E-32     | 0.006    | 4.11E-05     | 0.012             | 1.31E-01              | 0.238    | 9.12E-20     | 0.245             | 1.05E-03              | 0.006            | 7.72E-02             |
| 7         | cg00089486          | 0.193                                                 | 2.56E-26     | -0.020   | 9.37E-03     | 0.015             | 2.31E-01              | 0.173    | 3.50E-14     | 0.208             | 5.35E-03              | 0.035            | 1.64E-02             |
| 8         | cg21437028          | 0.515                                                 | 4.11E-35     | 0.023    | 8.59E-05     | 0.028             | 1.11E-01              | 0.539    | 2.97E-27     | 0.543             | 2.21E-05              | 0.004            | 3.09E-01             |
| 9         | cg21847036          | 0.506                                                 | 1.85E-40     | 0.031    | 1.49E-05     | 0.033             | 1.41E-01              | 0.538    | 2.22E-40     | 0.539             | 1.05E-07              | 0.001            | 7.44E-01             |
| 10        | cg15726154          | 0.397                                                 | 7.60E-33     | 0.216    | 1.36E-08     | 0.234             | 4.13E-02              | 0.613    | 3.75E-41     | 0.631             | 2.22E-08              | 0.018            | 5.43E-01             |
| 11        | cg00010946          | 0.064                                                 | 4.83E-06     | 0.245    | 2.61E-26     | 0.269             | 2.82E-05              | 0.309    | 1.51E-39     | 0.333             | 1.47E-10              | 0.024            | 3.43E-01             |
| 12        | cg17619405          | 0.153                                                 | 8.67E-13     | 0.299    | 5.34E-14     | 0.219             | 1.67E-02              | 0.451    | 1.15E-41     | 0.372             | 6.18E-09              | -0.079           | 9.22E-01             |
| 13        | cg18194945          | 0.098                                                 | 3.27E-03     | 0.325    | 2.45E-35     | 0.317             | 2.85E-05              | 0.424    | 1.16E-29     | 0.415             | 2.51E-05              | -0.008           | 9.53E-01             |
| 14        | cg04521004          | -0.061                                                | 7.53E-03     | 0.224    | 7.28E-18     | 0.227             | 4.76E-03              | 0.163    | 1.54E-07     | 0.166             | 8.07E-02              | 0.003            | 9.53E-01             |
| 15        | cg12993163          | -0.106                                                | 9.39E-04     | 0.229    | 5.83E-17     | 0.251             | 2.75E-03              | 0.123    | 4.01E-08     | 0.145             | 3.93E-02              | 0.021            | 3.05E-02             |
| 16        | cg09542210          | -0.012                                                | 8.11E-01     | 0.068    | 4.35E-09     | 0.075             | 5.35E-02              | 0.056    | 1.15E-07     | 0.063             | 7.66E-02              | 0.008            | 3.78E-01             |
| 17        | cg20501518          | 0.266                                                 | 1.25E-17     | 0.156    | 2.92E-13     | 0.155             | 1.66E-02              | 0.422    | 1.41E-23     | 0.421             | 3.54E-04              | -0.001           | 7.70E-01             |
| 18        | cg05512327          | 0.105                                                 | 4.04E-02     | 0.228    | 2.34E-22     | 0.195             | 3.13E-03              | 0.333    | 7.30E-18     | 0.300             | 3.72E-03              | -0.033           | 6.67E-01             |
| 19        | cg04913979          | 0.110                                                 | 3.58E-03     | 0.325    | 1.09E-19     | 0.310             | 6.47E-04              | 0.435    | 3.57E-19     | 0.419             | 4.10E-04              | -0.016           | 3.24E-01             |
| 20        | cg09220088          | 0.160                                                 | 4.93E-11     | 0.153    | 2.92E-05     | 0.177             | 1.89E-02              | 0.313    | 1.02E-14     | 0.337             | 2.48E-04              | 0.024            | 9.33E-02             |
| 21        | cg01557547          | -0.042                                                | 3.53E-12     | 0.018    | 2.81E-06     | 0.035             | 1.02E-01              | -0.024   | 5.67E-01     | -0.007            | 8.12E-01              | 0.017            | 3.08E-01             |
| 22        | cg04532033          | -0.091                                                | 4.79E-21     | 0.010    | 3.12E-03     | 0.057             | 1.03E-01              | -0.081   | 1.15E-16     | -0.034            | 2.23E-01              | 0.047            | 1.85E-03             |
| 23        | cg18899952          | -0.016                                                | 2.63E-05     | -0.007   | 1.99E-01     | -0.004            | 4.45E-01              | -0.022   | 1.85E-02     | -0.020            | 7.76E-01              | 0.003            | 3.72E-01             |
| 24        | cg16703882          | -0.266                                                | 3.51E-33     | 0.215    | 9.06E-14     | 0.210             | 1.76E-02              | -0.051   | 2.10E-02     | -0.056            | 4.06E-01              | -0.005           | 9.34E-01             |



|    |                                                                                   |        |          |        |          |       |          |        |          |        |          |        |          |
|----|-----------------------------------------------------------------------------------|--------|----------|--------|----------|-------|----------|--------|----------|--------|----------|--------|----------|
| 25 | cg06156376                                                                        | -0.177 | 3.49E-26 | 0.108  | 4.34E-08 | 0.113 | 6.71E-02 | -0.069 | 6.84E-05 | -0.064 | 2.21E-01 | 0.005  | 8.15E-01 |
| 26 | cg25977493                                                                        | -0.122 | 1.24E-20 | 0.087  | 8.77E-08 | 0.093 | 6.08E-02 | -0.034 | 3.38E-03 | -0.028 | 5.29E-01 | 0.006  | 6.25E-01 |
| 27 | cg26129769                                                                        | -0.336 | 8.85E-40 | 0.250  | 1.50E-11 | 0.246 | 1.31E-02 | -0.086 | 2.62E-11 | -0.091 | 1.03E-01 | -0.005 | 2.85E-01 |
| 28 | cg25694447                                                                        | -0.303 | 2.50E-39 | 0.211  | 2.25E-10 | 0.200 | 2.09E-02 | -0.092 | 6.92E-15 | -0.104 | 2.65E-02 | -0.011 | 3.61E-01 |
| 29 | cg14961949                                                                        | -0.025 | 3.37E-09 | 0.003  | 9.95E-05 | 0.026 | 1.27E-01 | -0.022 | 4.66E-01 | 0.000  | 5.58E-01 | 0.023  | 7.90E-04 |
| 30 | cg17191178                                                                        | -0.197 | 2.35E-25 | 0.125  | 3.37E-09 | 0.139 | 4.58E-02 | -0.072 | 2.28E-04 | -0.058 | 3.49E-01 | 0.014  | 5.30E-01 |
| 31 | cg15548431                                                                        | -0.016 | 1.61E-03 | -0.028 | 6.27E-02 | 0.012 | 2.57E-01 | -0.044 | 4.95E-01 | -0.005 | 4.55E-01 | 0.040  | 5.37E-03 |
| 32 | cg21503297                                                                        | -0.119 | 1.94E-23 | 0.056  | 1.83E-06 | 0.059 | 9.09E-02 | -0.063 | 1.25E-09 | -0.060 | 1.13E-01 | 0.003  | 2.70E-01 |
| 33 | cg25460158                                                                        | -0.195 | 7.42E-31 | 0.094  | 1.20E-06 | 0.133 | 3.19E-02 | -0.102 | 1.90E-13 | -0.062 | 2.15E-01 | 0.039  | 2.62E-02 |
| 34 | cg00591153                                                                        | -0.080 | 1.34E-18 | 0.036  | 5.69E-06 | 0.047 | 9.80E-02 | -0.043 | 3.54E-09 | -0.033 | 2.19E-01 | 0.011  | 1.86E-01 |
| 35 | cg24317285                                                                        | -0.272 | 1.29E-37 | 0.185  | 1.89E-12 | 0.194 | 1.14E-02 | -0.086 | 1.46E-05 | -0.078 | 3.50E-01 | 0.008  | 2.71E-01 |
|    | Mean of 4 450K probes<br>(cg25506747,<br>cg21552242,cg21437028<br>and cg21847036) | 0.411  | 9.38E-50 | 0.121  | 1.43E-11 | 0.103 | 3.46E-02 | 0.532  | 3.97E-40 | 0.514  | 3.85E-07 | -0.018 | 8.17E-01 |

Notes:

1. See Appendix Table S1 for lists of dataset.
2. The 450K data for non-malignant adult brain samples were from these six samples (TCGA-FG-5963, TCGA-FG-5964, TCGA-74-6573, TCGA-06-AABW from TCGA; GSM1088933, GSM1088934 from GEO), based on availability at time of analyses.

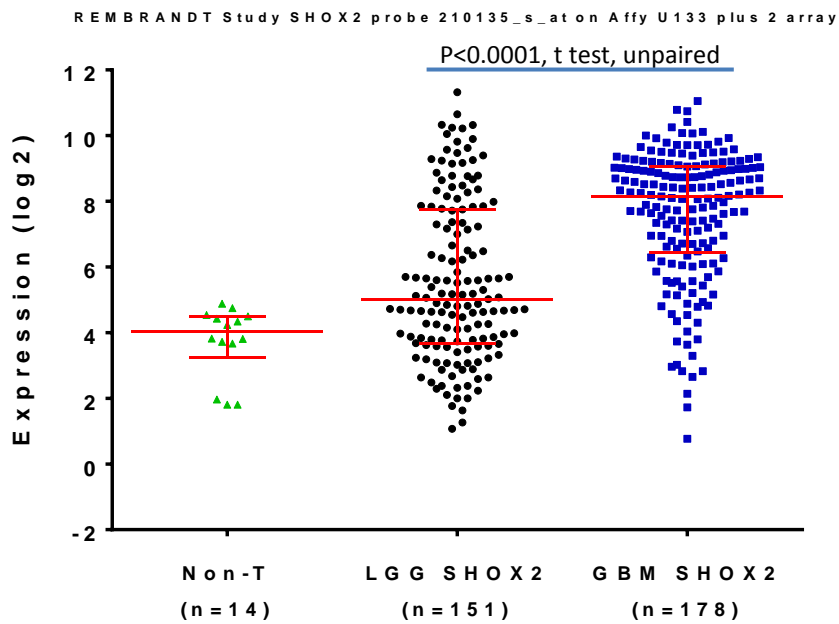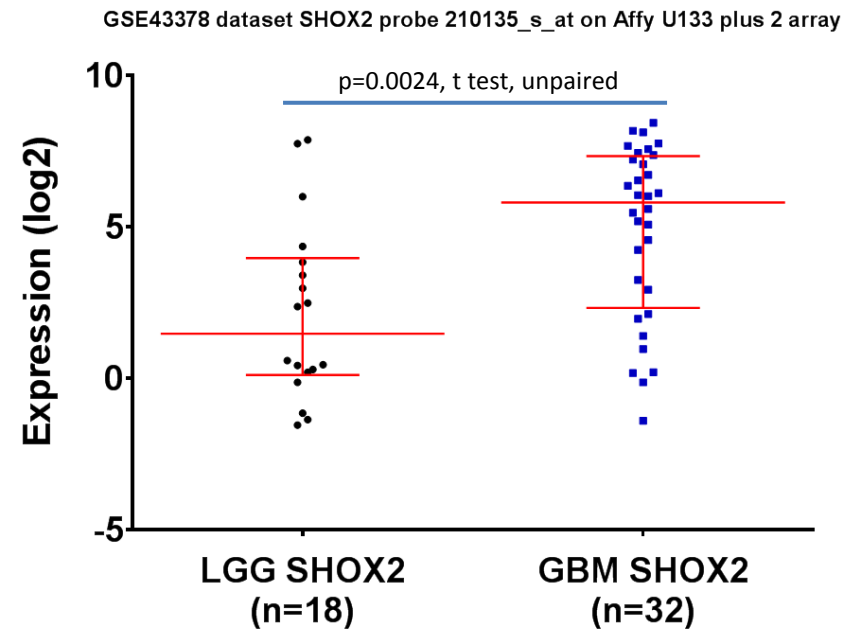

**Figure S2.** Validation of significantly higher *SHOX2* mRNA expression in GBM than in LGG in additional external datasets (REMBRANDT and GSE43378) besides TCGA LGG and GBM datasets (see Appendix Tables S1 for lists of datasets and data source). Non-T: non-tumor brain.

**Table S3.** Kaplan-Meier survival curve and univariate Cox proportional-hazards model analyses of *SHOX2* 450K probes and MGMT methylation marker in predicting overall survival of LGG patients (TCGA LGG Dataset).

| Variable                             | Cutoff beta value | Events/Patients | Median OS Years (95% CI) | Log-rank test p value | Hazard ratio (95% CI) | p value (Cox model) |
|--------------------------------------|-------------------|-----------------|--------------------------|-----------------------|-----------------------|---------------------|
| MGMT                                 |                   |                 |                          |                       |                       |                     |
| Methylated                           | NA                | 87/425          | 7.77 (6.26 to 10.90)     | reference             | reference             | reference           |
| Unmethylated                         | NA                | 39/90           | 3.31 (2.08 to 8.77)      | 5.89E-07              | 2.5610 (1.75 to 3.75) | 1.40E-06            |
| SHOX2 450K P1                        |                   |                 |                          |                       |                       |                     |
| Low                                  | <0.175            | 33/224          | 11.14 (8.77 to NA)       | reference             | reference             | reference           |
| High                                 | ≥0.175            | 91/288          | 5.25 (4.34 to 7.29)      | 2.86E-06              | 2.5239 (1.69 to 3.77) | 6.05E-06            |
| SHOX2 450K P2                        |                   |                 |                          |                       |                       |                     |
| Low                                  | <0.225            | 40/251          | 8.19 (6.67 to NA)        | reference             | reference             | reference           |
| High                                 | ≥0.225            | 86/264          | 5.18 (4.18 to 7.96)      | 5.41E-06              | 2.3313 (1.60 to 3.39) | 1.00E-05            |
| SHOX2 450K P8                        |                   |                 |                          |                       |                       |                     |
| Low                                  | <0.155            | 45/254          | 8.77 (7.88 to 12.09)     | reference             | reference             | reference           |
| High                                 | ≥0.155            | 81/261          | 4.56 (4.08 to 7.59)      | 1.17E-06              | 2.4169 (1.67 to 3.49) | 2.44E-06            |
| SHOX2 450K P9                        |                   |                 |                          |                       |                       |                     |
| Low                                  | <0.205            | 46/277          | 7.88 (6.12 to 12.18)     | reference             | reference             | reference           |
| High                                 | ≥0.205            | 80/236          | 5.18 (3.03 to 8.19)      | 4.85E-07              | 2.4722 (1.72 to 3.56) | 1.12E-06            |
| SHOX2 450K P10                       |                   |                 |                          |                       |                       |                     |
| Low                                  | <0.205            | 26/175          | 11.59 (6.67 to NA)       | reference             | reference             | reference           |
| High                                 | ≥0.205            | 100/340         | 5.48 (4.56 to 8.77)      | 2.95E-05              | 2.4598 (1.59 to 3.80) | 5.18E-05            |
| SHOX2 Ave of 450K Probes 1, 2, 8 & 9 |                   |                 |                          |                       |                       |                     |

|      |        |        |                      |           |                       |           |
|------|--------|--------|----------------------|-----------|-----------------------|-----------|
| Low  | <0.357 | 65/354 | 8.19 (7.29 to 11.19) | reference | reference             | reference |
| High | ≥0.357 | 61/161 | 2.83 (2.52 to 4.56)  | 3.45E-12  | 3.3278 (2.33 to 4.76) | 4.30E-11  |

Notes

1. See Appendix Table S2 for 450K probes numbers designated and their corresponding 450K probe ID.
2. See Appendix Tables S1 for lists of datasets and data source.
3. MGMT methylation status data were based on the Supplemental Table S1A as described previously by Ceccarelli M et al Cell (2016)164:3 (see Appendix Table S1). NA: not available.

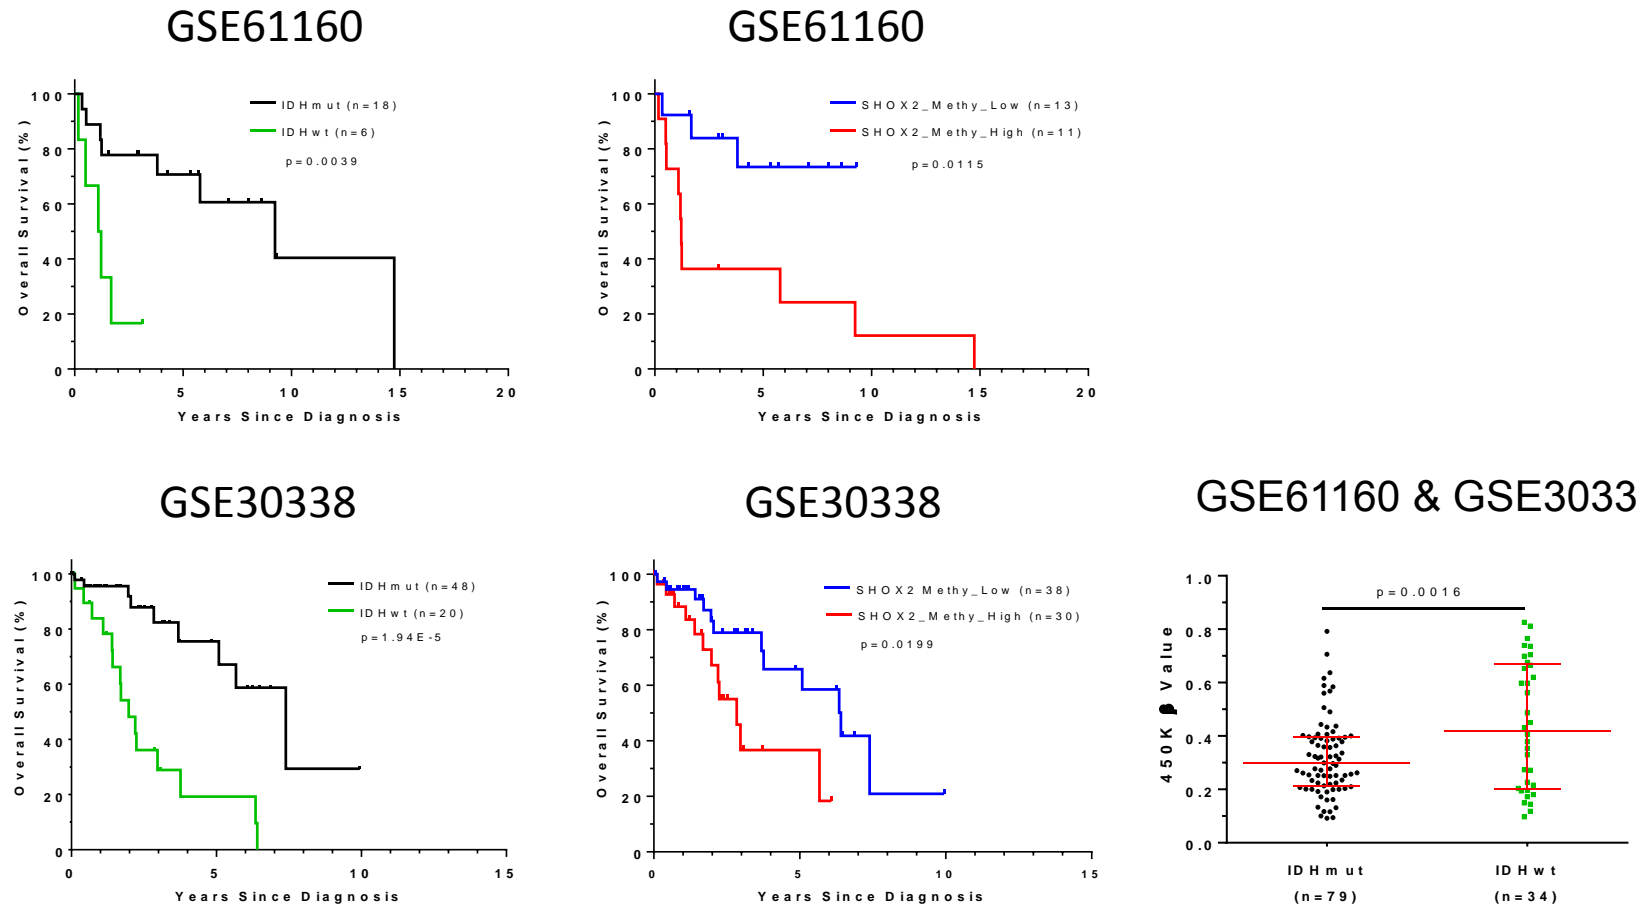

**Figure S3.** Kaplan-Meier overall survival curve (OS) analyses of *SHOX2* methylation in additional external 450K microarray methylation datasets besides the TCGA LGG dataset. *SHOX2* methylation and *IDH* marker data from GSE61160 and GSE30338 datasets were analyzed and compared individually. The beta cutoff value of pooled mean *SHOX2* probes (P1,2,8,9): 0.357 (see Methods/Materials and Appendix Table S2B). p: Log-rank test. Wt: wild type; mut: mutation. See Appendix Tables S1 for lists of datasets and data source.

**Table S4.** External methylation datasets: The Kaplan-Meier survival curve analyses and univariate Cox proportional-hazards model analyses of *SHOX2* methylation and *IDH* status in predicting overall survival of LGG patients.

| Datasets             | Variable         | IDH Genotype | Events/Patients | Median OS Years (95% CI) | Log-rank test p value | Hazard ratio (95% CI) | p value (Cox model) |
|----------------------|------------------|--------------|-----------------|--------------------------|-----------------------|-----------------------|---------------------|
| GSE30338<br>GSE61160 | IDH status       |              |                 |                          |                       |                       |                     |
|                      | IDHmut           | mut          | 17/66           | 9.24 (5.78 to NA)        | reference             | reference             | reference           |
|                      | IDHwt            | wt           | 20/26           | 1.68 (1.40 to 6.35)      | 7.43E-08              | 5.59 (2.78 to 11.26)  | 1.42E-06            |
|                      |                  |              |                 |                          |                       |                       |                     |
| GSE30338<br>GSE61160 | SHOX2 expression |              |                 |                          |                       |                       |                     |
|                      | Low              | wt or mut    | 15/52           | 7.39 (5.08 to NA)        | reference             | reference             | reference           |
|                      | High             | wt or mut    | 22/40           | 2.24 (1.4 to NA)         | 0.0014                | 2.88 (1.47 to 5.65)   | 0.0022              |
|                      |                  |              |                 |                          |                       |                       |                     |
|                      | Low              | wt           | 7/10            | 3.76 (1.68 to NA)        | reference             | reference             | reference           |
|                      | High             | wt           | 13/16           | 1.40 (1.09 to 2.97)      | 0.0374                | 3.15 (1.01 to 9.82)   | 0.0477              |
|                      |                  |              |                 |                          |                       |                       |                     |
|                      | Low              | mut          | 8/42            | NA (7.39 to NA)          | reference             | reference             | reference           |
|                      | High             | mut          | 9/24            | 5.78 (2.84 to NA)        | 0.1055                | 2.21 (0.83 to 5.94)   | 0.1144              |

Note: The data from the combined 450K microarray datasets (GSE30338 and GSE61160) were analyzed with increased sample size. The beta cutoff value of pooled mean *SHOX2* probes (P1,2,8,9): 0.357 (see Methods/Materials and Appendix Table S2B). Wt: wild type; mut: mutation. See Appendix Tables S1 for lists of datasets and data source. See Appendix Tables S1 for lists of datasets and data source.

**Table S5.** External expression datasets: The Kaplan-Meier survival curve analyses and univariate Cox proportional-hazards model analyses of *SHOX2* methylation and *IDH* status in predicting overall survival of LGG patients.

| Datasets | Variable         | IDH Genotype | Events/Patients | Median OS Years (95% CI) | Log-rank test p value | Hazard ratio (95% CI) | p value (Cox model) |
|----------|------------------|--------------|-----------------|--------------------------|-----------------------|-----------------------|---------------------|
| GSE30336 | IDH status       |              |                 |                          |                       |                       |                     |
|          | IDHmut           | mut          | 8/36            | 7.39 (5.67 to NA)        | reference             | reference             | reference           |
|          | IDHwt            | wt           | 10/12           | 1.71 (1.42 to NA)        | 1.49E-04              | 5.40 (2.04 to 14.29)  | 6.88E-04            |
|          |                  |              |                 |                          |                       |                       |                     |
| GSE30336 | SHOX2 expression |              |                 |                          |                       |                       |                     |
|          | Low              | wt or mut    | 12/40           | 6.41 (5.67 to NA)        | reference             | reference             | reference           |
|          | High             | wt or mut    | 6/8             | 1.54 (1.09 to NA)        | 2.95E-06              | 9.91 (3.09 to 31.78)  | 1.16E-04            |
|          |                  |              |                 |                          |                       |                       |                     |
|          | Low              | wt           | 4/6             | 6.35 (1.71 to NA)        | reference             | reference             | reference           |
|          | High             | wt           | 6/6             | 1.54 (1.09 to NA)        | 0.0467                | 4.54 (0.90 to 22.99)  | 0.0677              |
|          |                  |              |                 |                          |                       |                       |                     |
|          | Low              | mut          | 8/34            | 7.39 (5.67 to NA)        | reference             | reference             | reference           |
|          | High             | mut          | 0/2             | NA                       |                       |                       |                     |
|          |                  |              |                 |                          |                       |                       |                     |
| GSE16011 | IDH status       |              |                 |                          |                       |                       |                     |
|          | IDHmut           | mut          | 41/47           | 3.76 (2.37 to 5.97)      | reference             | reference             | reference           |
|          | IDHwt            | wt           | 32/41           | 1.81 (1.14 to 2.87)      | 3.60E-01              | 1.25 (0.48 to 1.99)   | 3.61E-01            |
|          |                  |              |                 |                          |                       |                       |                     |
| GSE16011 | SHOX2 expression |              |                 |                          |                       |                       |                     |
|          | Low              | wt or mut    | 54/70           | 5.62 (3.49 to 8.0)       | reference             | reference             | reference           |
|          | High             | wt or mut    | 38/39           | 1.19 (0.79 to 1.80)      | 2.00E-05              | 2.48 (1.61 to 3.80)   | 3.48E-05            |
|          |                  |              |                 |                          |                       |                       |                     |
|          | Low              | wt           | 13/21           | 7.52 (3.71 to 15.23)     | reference             | reference             | reference           |
|          | High             | wt           | 19/20           | 0.66 (0.32 to 1.33)      | 1.77E-03              | 3.19 (1.50 to 6.82)   | 2.67E-03            |
|          |                  |              |                 |                          |                       |                       |                     |

|                 |                           |           |        |                      |           |                     |           |
|-----------------|---------------------------|-----------|--------|----------------------|-----------|---------------------|-----------|
|                 | Low                       | mut       | 27/33  | 5.62 (2.95 to 10.72) | reference | reference           | reference |
|                 | High                      | mut       | 14/14  | 2.02 (1.06 to 3.85)  | 1.43E-02  | 2.26 (1.16 to 4.41) | 1.70E-02  |
|                 |                           |           |        |                      |           |                     |           |
| REMBRANDT study | SHOX2 expression by Gene  |           |        |                      |           |                     |           |
|                 | Low                       | wt or mut | 60/104 | 66.4 (45.3 to 94.5)  | reference | reference           | reference |
|                 | High                      | wt or mut | 46/47  | 15.3 (12.7 to 22.3)  | 6.03E-10  | 3.32 (2.23 to 4.96) | 4.12E-09  |
|                 |                           |           |        |                      |           |                     |           |
| REMBRANDT study | SHOX2 expression by probe |           |        |                      |           |                     |           |
|                 | Low                       | wt or mut | 81/126 | 49.2 (42.5 to 74.9)  | reference | reference           | reference |
|                 | High                      | wt or mut | 25/25  | 12.0 (9.0 to 17.7)   | 9.37E-10  | 4.08 (2.51 to 6.62) | 1.31E-08  |

Notes: The cutoff values by mclust analyses for *SHOX2* mRNA expression by probe (probe\_210135\_s\_at) in each dataset were 5.922 (GSE16011), 5.678 (GSE30336) and 6.575 (REMBRANDT), respectively. The cutoff value by mclust analyses for *SHOX2* expression in the dataset by gene available from REMBRANDT study Betastasis source was 7.315. See Materials/Methods and Appendix Tables S1 for lists of datasets and data source. NA: not available.



**Table S6.** Grade II-III diffuse gliomas distributions classified by *SHOX2* expression and IDH status (TCGA LGG RNA Seq datasets).

|                        | IDHmut     | IDHwt     | Row Total | p value  |
|------------------------|------------|-----------|-----------|----------|
| All cases              |            |           |           |          |
| SHOX2_Low              | 385 (0.75) | 27 (0.05) | 412       |          |
| SHOX2_High             | 33 (0.06)  | 67 (0.13) | 100       |          |
| Sub-column Total       | 418        | 94        | 512       | <1.0E-15 |
| AS grade II-III tumors |            |           |           |          |
| SHOX2_Low              | 123 (0.64) | 13 (0.07) | 136       |          |
| SHOX2_High             | 12 (0.06)  | 44 (0.23) | 56        |          |
| Sub-column Total       | 135        | 57        | 192       | <1.0E-15 |
| OD grade II-III tumors |            |           |           |          |
| SHOX2_Low              | 155 (0.82) | 9 (0.05)  | 164       |          |
| SHOX2_High             | 14 (0.07)  | 12 (0.06) | 25        |          |
| Sub-column Total       | 169        | 21        | 190       | 4.38E-07 |
| OA grade II-III tumors |            |           |           |          |
| SHOX2_Low              | 107 (0.82) | 5 (0.04)  | 112       |          |
| SHOX2_High             | 7 (0.05)   | 11 (0.08) | 18        |          |
| Sub-column Total (n)   | 114        | 16        | 130       | 1.58E-08 |

The RNA-Seq expression data (cutoff value of 4.135 for *SHOX2* expression) from TCGA LGG dataset were analyzed.

Numbers in parentheses: fraction of total each group; p value: Fisher's exact test, Two-sided.

AS: astrocytomas; OD: oligodendrogliomas; OA: oligoastrocytomas.

See Appendix Table S1 for detailed sample source and data.

**Table S7.** The Kaplan-Meier overall survival (OS) curve analyses and univariate Cox proportional-hazards model analyses of *SHOX2* expression by histology and tumor grades (TCGA LGG dataset).

| Datasets          | Variable         | Events/Patients | Median OS Years (95% CI) | Log-rank test p-value | Hazard ratio (95% CI) | p value (Cox model) |
|-------------------|------------------|-----------------|--------------------------|-----------------------|-----------------------|---------------------|
| Astrocytoma       | SHOX2 expression |                 |                          |                       |                       |                     |
|                   | Low              | 28/138          | 7.77 (5.62 to NA)        | reference             | reference             | reference           |
|                   | High             | 30/56           | 1.99 (1.62 to 2.83)      | 3.15E-14              | 7.28 (4.07 to 13.03)  | 2.31E-11            |
| Oligodendroglioma | SHOX2 expression |                 |                          |                       |                       |                     |
|                   | Low              | 31/164          | 7.96 (6.52 to NA)        | reference             | reference             | reference           |
|                   | High             | 12/27           | 2.77 (2.16 to NA)        | 0.0055                | 2.55 (1.29 to 5.03)   | 0.0071              |
| Grade II          | SHOX2 expression |                 |                          |                       |                       |                     |
|                   | Low              | 31/228          | 10.90 (7.96 to NA)       | reference             | reference             | reference           |
|                   | High             | 7/21            | 5.25 (2.16 to NA)        | 0.0319                | 2.45 (1.05 to 5.70)   | 0.0373              |
| Grade III         | SHOX2 expression |                 |                          |                       |                       |                     |
|                   | Low              | 44/186          | 6.25 (4.34 to 11.60)     | reference             | reference             | reference           |
|                   | High             | 44/80           | 1.99 (1.62 to 2.70)      | 4.64E-14              | 4.83 (3.09 to 7.55)   | 5.43E-12            |

Note:

The RNA-Seq expression data (cutoff value of 4.135 for *SHOX2* expression) from TCGA LGG dataset were analyzed. The grades II or III LGG samples included all histology types in TCGA LGG RNA-Seq dataset analyzed. See Appendix Tables S1 for lists of datasets and data source.

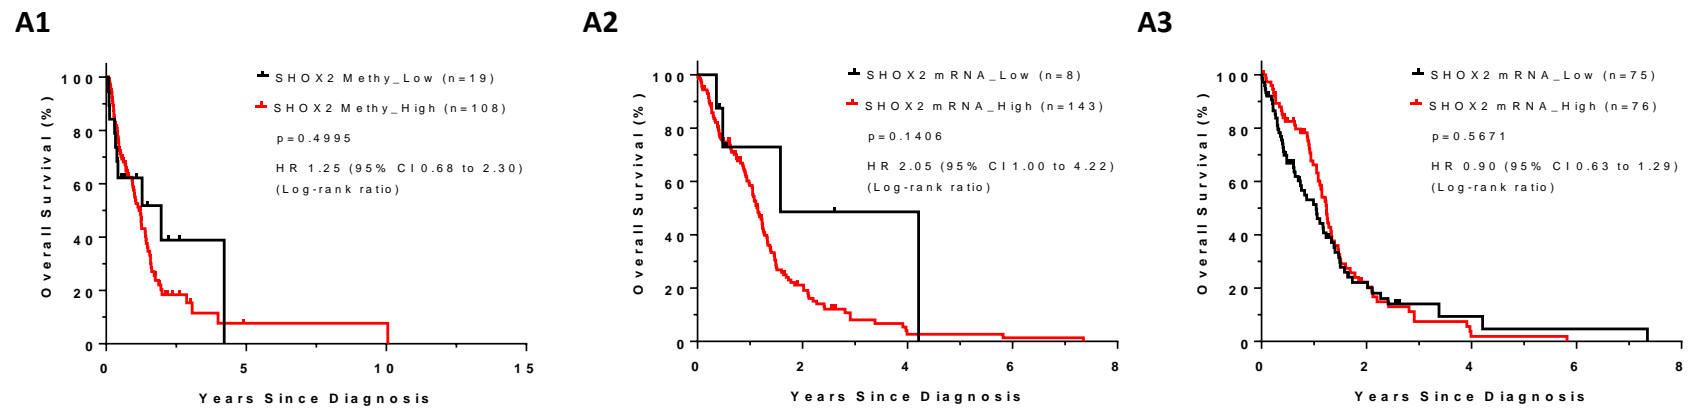

**Figure S4.** The Kaplan-Meier overall survival curve analyses of *SHOX2* methylation and expression marker in GBM (TCGA GBM 450K microarray and RNA Seq V2 dataset). The cutoff values were used as 0.357 of beta values (A1), 4.135 of RNA-SeqV2 (log2) (A2), respectively, based analyses of large dataset of TCGA LGG dataset (n=516). Alternatively, the analyses data were presented in A3 using 7.835 of median value RNA-SeqV2 of TCGA GBM dataset. p: Log-rank test.. HR: hazard ratio. See Appendix Tables S1for lists of datasets and data source.

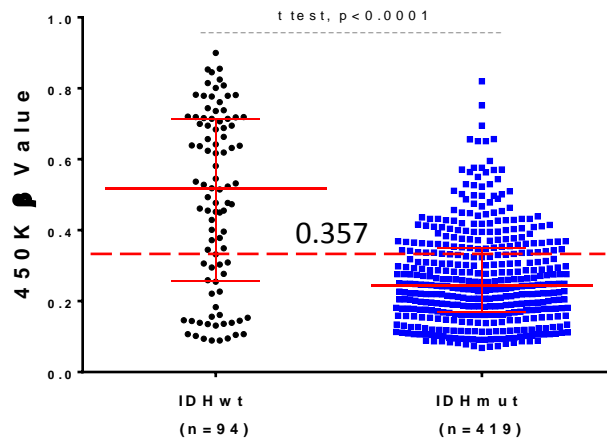

|                       | IDHwt | IDHmut |
|-----------------------|-------|--------|
| Median $\beta$ Value  | 0.52  | 0.25   |
| % ( $\beta > 0.357$ ) | 66.0  | 23.6   |

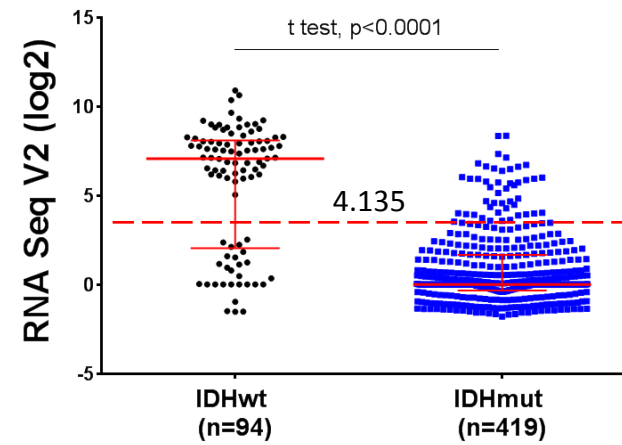

|                    | IDHwt | IDHmut |
|--------------------|-------|--------|
| Median R.Seq Value | 7.1   | 0.0    |
| % (R.Seq > 4.135)  | 71.3  | 7.9    |

**Figure S5.** Identification of significant associations between high *SHOX2* methylation or expression and the LGG tumors with *IDH* wild-type (*IDHwt*) status (TCGA LGG dataset). The cutoff values to dichotomize samples were 0.357 and 4.135, for the 450K methylation and RNA SeqV2 dataset, respectively, as determined by mclust analysis. Mut: mutation. See Appendix Tables S1 for lists of datasets and data source.

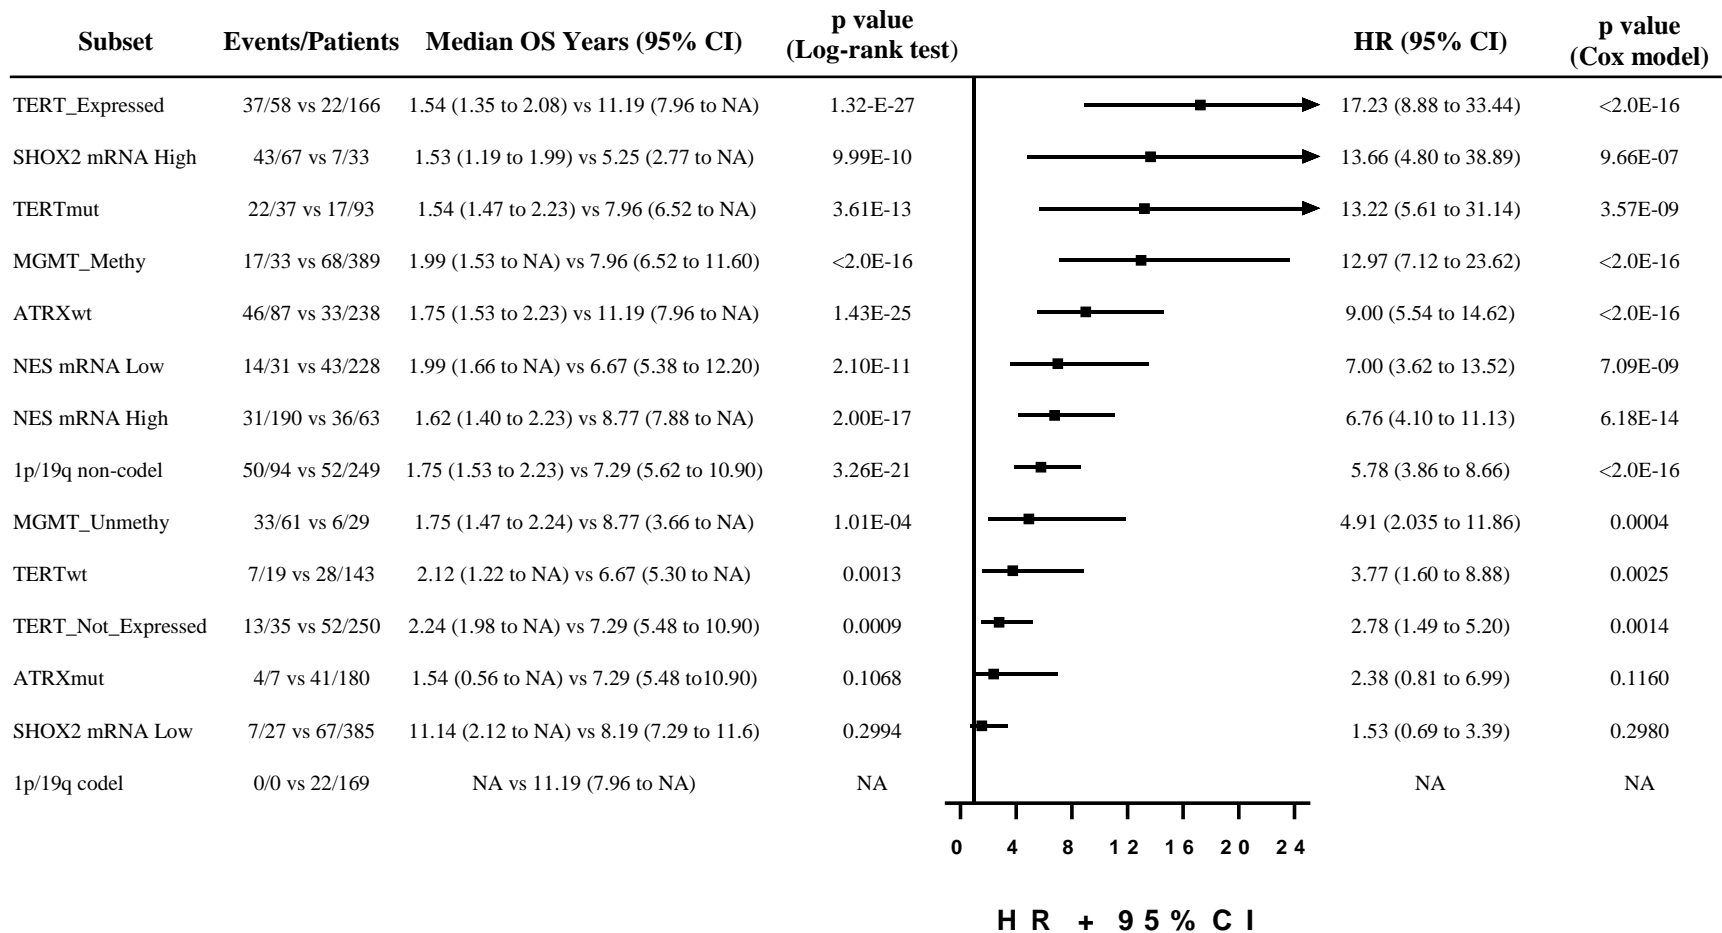

**Figure S6.** The univariate Cox proportional-hazards model analyses of *IDH* marker (wild-type vs mut) in the subsets of LGG sub-classified by *SHOX2* expression or other relevant markers as individual markers (TCGA LGG datasets). TCGA LGG samples were sub-classified into each subset based on *TERT* (mRNA) expressed or not-expressed, *SHOX2* mRNA expression high or low, *TERT* (promoter) mut or wt, *NES* mRNA expression high or low (using median as cutoff value and see Figure 3B), 1p/19q non-codel or codel, or *MGMT* (promoter) unmethylated or methylated, respectively. See Appendix Tables S1 for lists of datasets and data source. HR: hazard ratio. Arrow sign indicates that upper limit of HR 95% CI is > x axis limit (24). NA: not available.

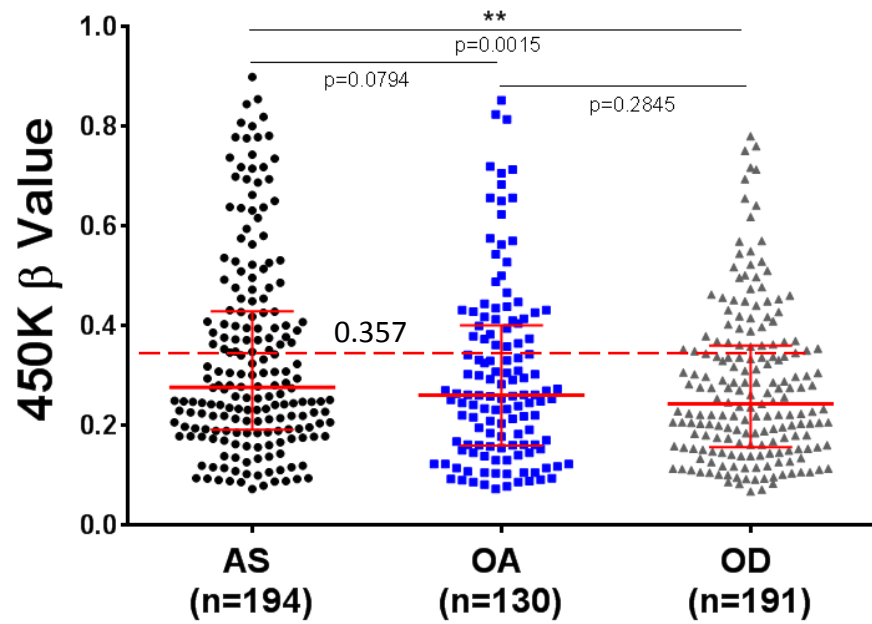

|                       | AS   | OA   | OD   |
|-----------------------|------|------|------|
| Median $\beta$ Value  | 0.28 | 0.26 | 0.24 |
| % ( $\beta > 0.357$ ) | 36.6 | 31.5 | 25.7 |

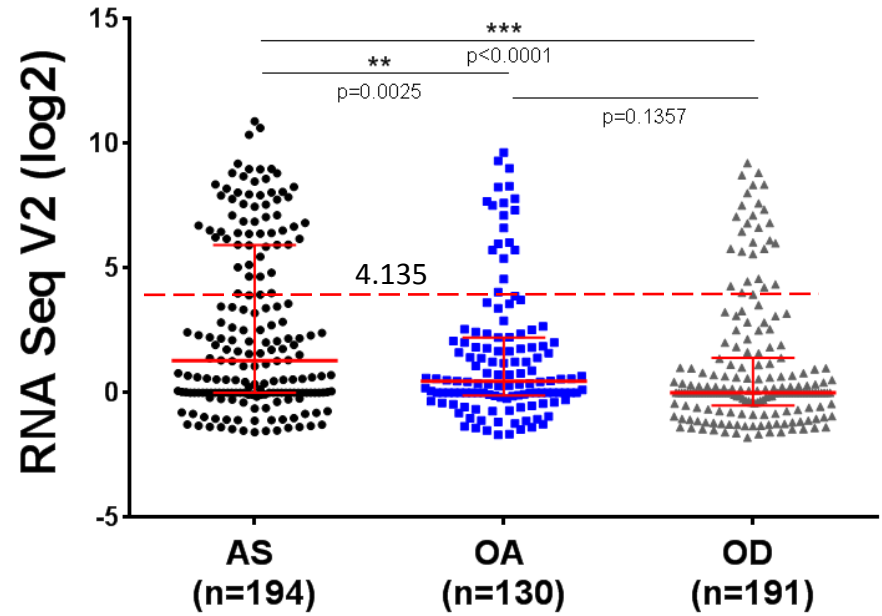

|                    | AS   | OA   | OD   |
|--------------------|------|------|------|
| Median R.Seq Value | 1.29 | 0.48 | 0.00 |
| % (R.Seq > 4.135)  | 28.9 | 13.8 | 14.1 |

**Figure S7.** Distribution of *SHOX2* methylation and mRNA expression by histology types in LGG patients (TCGA LGG dataset). The cutoff values to dichotomize samples were 0.357 and 4.135, for the 450K methylation and RNA SeqV2 dataset, respectively, as determined by mclust analysis. See Appendix Tables S1 for lists of datasets and data source. AS: astrocytoma; OA: oligoastrocytoma; OD: oligodendroglioma. p value: unpaired t test (two-side). Lines and bars: median with interquartile range.

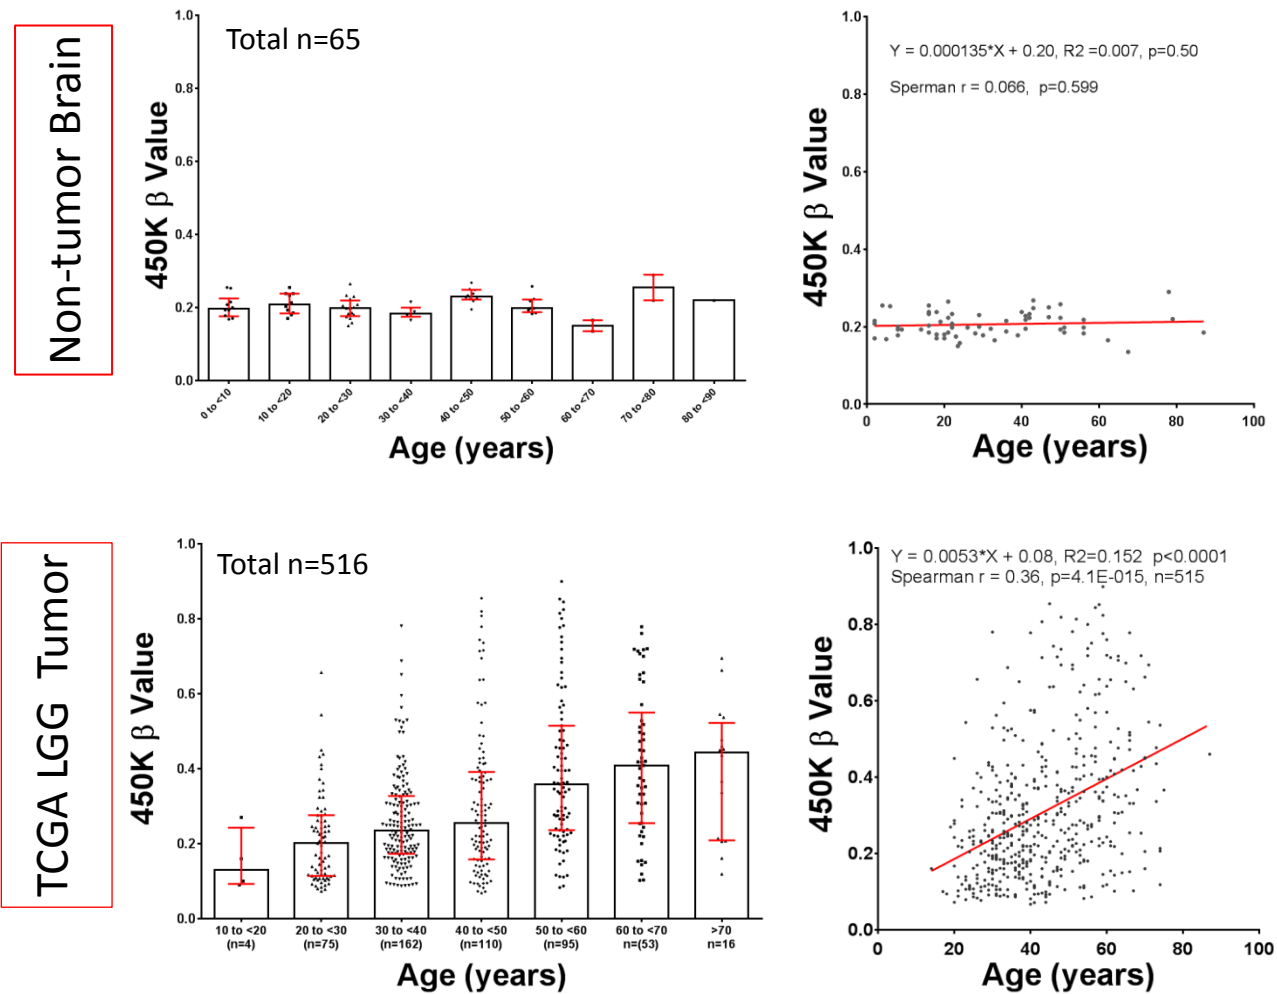

**Figure S8.** Relationship between *SHOX2* methylation and age in non-malignant brain tissues and LGG gliomas tumors (TCGA LGG dataset). The pooled *SHOX2* 450K methylation probes data (Probes 1, 2, 8 and 9) were presented including non-malignant brain tissues [combined samples from GSE53126, GSE41826, GSE44684, non-malignant brain samples (n=4) from TCGA LGG and TCGA GBM datasets], and TCGA LGG tumor samples. See Appendix Tables S1 and S2 for lists of datasets and data source.

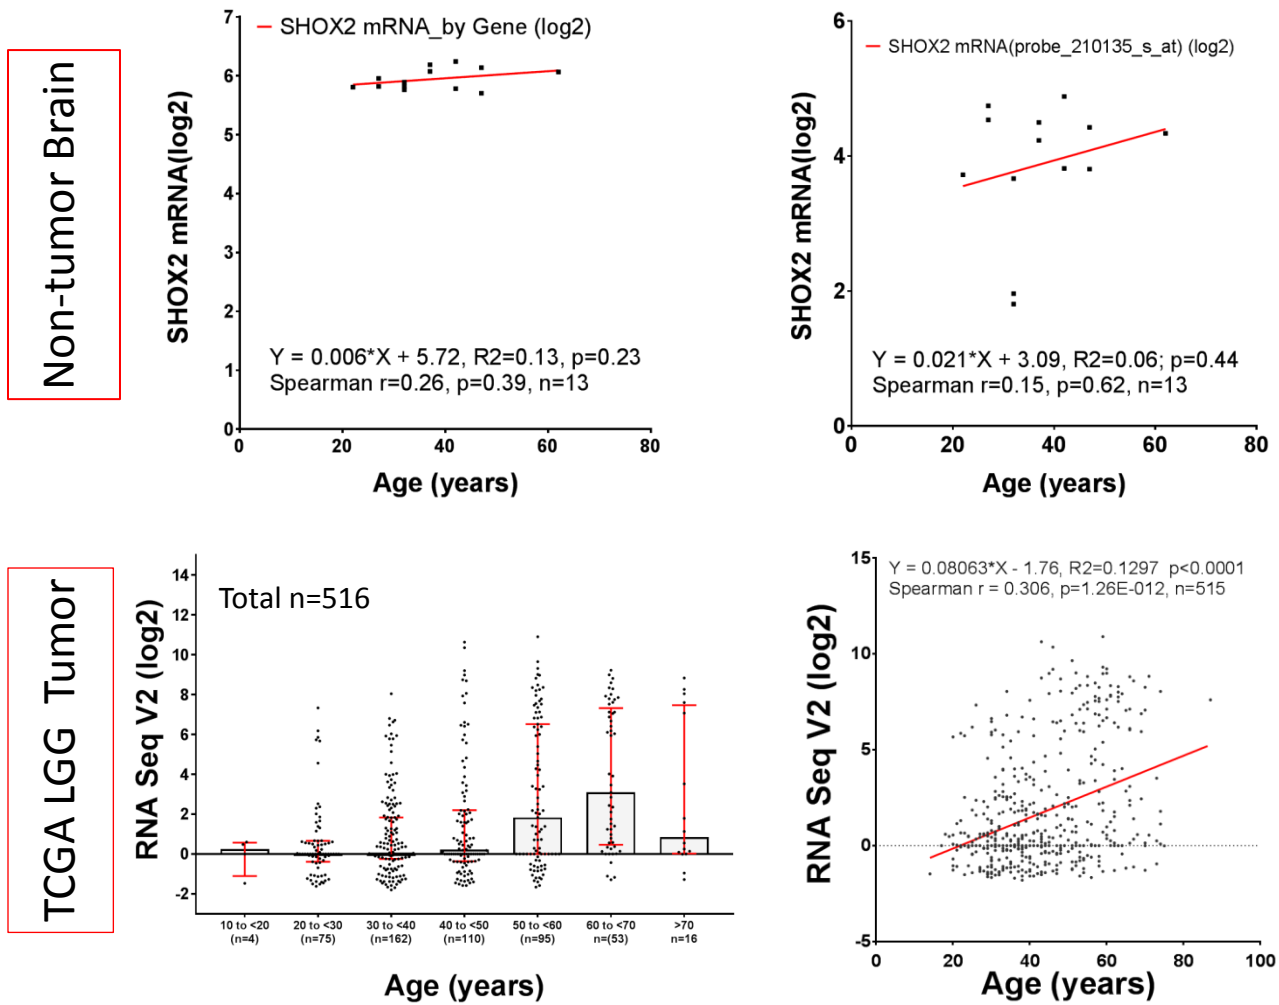

**Figure S9.** Relationship between *SHOX2* expression and age in non-malignant brain tissues and LGG gliomas tumors (TCGA LGG dataset). *SHOX2* mRNA expression were presented including nonmalignant brain tissues [REMBRANDT microarray dataset ( $n=13$ ): analyses data by using the values (log2) by Gene or the values by specific array probe], and TCGA LGG tumor samples (RNA SeqV2). See Appendix Tables S1 for lists of datasets and data source.



**Table S8A.** *SHOX2* expression alone: The multivariate Cox proportional-hazards models analyses for LGG patients (TCGA LGG dataset).

| Variable                | Cases of all age (n=515, events=126) |          | Cases of age <48 (n=331, events=66) |          | Cases of age ≥48 (n=184, events=60) |          |
|-------------------------|--------------------------------------|----------|-------------------------------------|----------|-------------------------------------|----------|
|                         | Hazard ratio (95% CI)                | p value  | Hazard ratio (95% CI)               | p value  | Hazard ratio (95% CI)               | p value  |
| SHOX2 High vs Low       | 3.3830 (2.25 to 5.09)                | 5.12E-09 | 3.0030 (1.54 to 5.87)               | 1.29E-03 | 3.8658 (2.13 to 7.02)               | 8.76E-06 |
| Age                     | 1.0519 (1.04 to 1.07)                | 7.88E-10 | 1.0592 (1.02 to 1.11)               | 7.36E-03 | 1.1078 (1.07 to 1.15)               | 2.01E-07 |
| Gender (male vs female) | 1.2979 (0.90 to 1.87)                | 1.64E-01 | 1.3032 (0.77 to 2.20)               | 3.23E-01 | 1.2321 (0.72 to 2.12)               | 4.50E-01 |
| Histology (OA vs A)     | 0.8292 (0.51 to 1.34)                | 4.45E-01 | 0.9126 (0.48 to 1.72)               | 7.78E-01 | 0.7651 (0.35 to 1.66)               | 4.98E-01 |
| Histology (OD vs A)     | 0.5265 (0.34 to 0.81)                | 3.60E-03 | 0.6472 (0.35 to 1.20)               | 1.67E-01 | 0.5068 (0.27 to 0.94)               | 3.04E-02 |
| Tumor Grade ( 3 vs 2)   | 2.2406 (1.47 to 3.41)                | 1.70E-04 | 1.8287 (1.06 to 3.15)               | 2.94E-02 | 3.4302 (1.55 to 7.58)               | 2.32E-03 |

**Table S8B.** *IDH* alone: The multivariate Cox proportional-hazards models analyses for LGG patients (TCGA LGG dataset).

| Variable                | Cases of all age (n=512, events=124) |          | Cases of age <48 (n=329, events=65) |          | Cases of age ≥48 (n=183, events=59) |          |
|-------------------------|--------------------------------------|----------|-------------------------------------|----------|-------------------------------------|----------|
|                         | Hazard ratio (95% CI)                | p value  | Hazard ratio (95% CI)               | p value  | Hazard ratio (95% CI)               | p value  |
| IDH wt vs mut           | 3.8205 (2.47 to 5.90)                | 1.44E-09 | 2.6501 (1.19 to 5.90)               | 1.71E-02 | 5.5110 (2.79 to 10.87)              | 8.43E-07 |
| Age                     | 1.0506 (1.03 to 1.07)                | 1.08E-09 | 1.0678 (1.02 to 1.11)               | 1.96E-03 | 1.0847 (1.04 to 1.13)               | 7.78E-05 |
| Gender (male vs female) | 1.1919 (0.82 to 1.72)                | 3.51E-01 | 1.3408 (0.77 to 2.32)               | 2.98E-01 | 0.9173 (0.54 to 1.56)               | 0.74983  |
| Histology (OA vs A)     | 0.9104 (0.56 to 1.49)                | 7.09E-01 | 1.1026 (0.56 to 2.16)               | 7.76E-01 | 0.7478 (0.35 to 1.60)               | 0.45255  |
| Histology (OD vs A)     | 0.6758 (0.44 to 1.04)                | 7.44E-02 | 0.7245 (0.39 to 1.35)               | 3.09E-01 | 0.6939 (0.37 to 1.29)               | 0.24618  |
| Tumor Grade ( 3 vs 2)   | 1.9538 (1.29 to 2.95)                | 1.48E-03 | 1.4952 (0.85 to 2.63)               | 1.62E-01 | 3.3363 (1.52 to 7.31)               | 0.00263  |

**Table S8C.** *SHOX2* and *IDH* comparison: The multivariate Cox proportional-hazards models analyses for LGG patients (TCGA LGG dataset).

| Variable                | Cases of all age (n=512, events=124) |          | Cases of age <48 (n=329, events=65) |          | Cases of age ≥48 (n=183, events=59) |          |
|-------------------------|--------------------------------------|----------|-------------------------------------|----------|-------------------------------------|----------|
|                         | Hazard ratio (95% CI)                | p value  | Hazard ratio (95% CI)               | p value  | Hazard ratio (95% CI)               | p value  |
| SHOX2 high vs low       | 2.6411 (1.61 to 4.34)                | 1.27E-04 | 2.5693 (1.27 to 5.20)               | 8.69E-03 | 2.1858 (0.92 to 5.2)                | 7.78E-02 |
| IDH wt vs mut           | 2.5258 (1.52 to 4.20)                | 3.47E-04 | 2.0250 (0.89 to 4.59)               | 9.13E-02 | 3.1987 (1.28 to 7.99)               | 1.27E-02 |
| Age                     | 1.0468 (1.09 to 1.6)                 | 8.80E-08 | 1.0614 (1.02 to 1.11)               | 5.55E-03 | 1.0917 (1.05 to 1.14)               | 1.88E-05 |
| Gender (male vs female) | 1.3511 (0.93 to 1.97)                | 1.15E-01 | 1.4346 (0.83 to 2.49)               | 1.98E-01 | 1.0666 (0.61 to 1.86)               | 8.21E-01 |
| Histology (OA vs A)     | 0.9541 (0.58 to 1.56)                | 8.51E-01 | 1.0950 (0.55 to 2.16)               | 7.94E-01 | 0.7953 (0.37 to 1.71)               | 5.56E-01 |
| Histology (OD vs A)     | 0.6645 (0.43 to 1.03)                | 6.68E-02 | 0.7229 (0.38 to 1.37)               | 3.18E-01 | 0.6774 (0.36 to 1.27)               | 2.22E-01 |
| Tumor Grade ( 3 vs 2)   | 1.7658 (1.15 to 2.72)                | 9.56E-03 | 1.5317 (0.86 to 2.72)               | 1.44E-01 | 2.7635 (1.22 to 6.24)               | 1.44E-02 |

**Table S8D.** *SHOX2* and 1p/19q comparison: The multivariate Cox proportional-hazards models analyses for LGG patients (TCGA LGG dataset).

| Variable | Cases of all age (n=512, events=124) |         | Cases of age <48 (n=331, events=65) |         | Cases of age ≥48 (n=184, events=60) |         |
|----------|--------------------------------------|---------|-------------------------------------|---------|-------------------------------------|---------|
|          | Hazard ratio (95% CI)                | p value | Hazard ratio (95% CI)               | p value | Hazard ratio (95% CI)               | p value |

|                           |                       |          |                        |          |                       |          |
|---------------------------|-----------------------|----------|------------------------|----------|-----------------------|----------|
| SHOX2 high vs low         | 2.8689 (1.87 to 4.39) | 1.27E-06 | 3.5828 (1.79 to 7.15)  | 2.97E-04 | 4.0788 (2.03 to 8.18) | 7.59E-05 |
| Age                       | 1.0521 (1.04 to 1.07) | 5.59E-10 | 1.0785 (1.03 to 1.12)  | 3.72E-04 | 1.1100 (1.07 to 1.15) | 2.00E-07 |
| Gender (male vs female)   | 1.2321 (0.85 to 1.78) | 0.26551  | 1.7750 (1.03 to 3.07)  | 4.05E-02 | 1.2607 (0.72 to 2.21) | 4.19E-01 |
| Histology (OA vs A)       | 0.9024 (0.56 to 1.46) | 0.67548  | 1.1415 (0.60 to 2.17)  | 6.86E-01 | 0.7558 (0.35 to 1.65) | 4.82E-01 |
| Histology (OD vs A)       | 0.8456 (0.51 to 1.41) | 0.52266  | 1.9511 (0.94 to 4.06)  | 7.37E-02 | 0.4740 (0.22 to 1.01) | 5.45E-02 |
| Tumor Grade ( 3 vs 2)     | 2.3642 (1.55 to 3.61) | 6.79E-05 | 1.8095 (1.05 to 3.13)  | 3.39E-02 | 3.3787 (1.52 to 7.51) | 2.82E-03 |
| 1p/19q non-codel vs codel | 2.2966 (1.30 to 4.06) | 0.00424  | 7.2398 (2.80 to 18.67) | 4.32E-05 | 0.8757 (0.36 to 2.10) | 7.66E-01 |

**Table S8E.** *SHOX2* and *MGMT* comparison: The multivariate Cox proportional-hazards models analyses for LGG patients (TCGA LGG dataset).

| Variable                | Cases of all age (n=515, events=126) |          | Cases of age <48 (n=331, events=66) |          | Cases of age ≥48 (n=184, events=60) |          |
|-------------------------|--------------------------------------|----------|-------------------------------------|----------|-------------------------------------|----------|
|                         | Hazard ratio (95% CI)                | p value  | Hazard ratio (95% CI)               | p value  | Hazard ratio (95% CI)               | p value  |
| SHOX2 High vs Low       | 3.0808 (2.01 to 4.71)                | 2.09E-07 | 3.2982 (1.68 to 6.48)               | 5.29E-04 | 2.9967 (1.53 to 5.86)               | 1.33E-03 |
| Age                     | 1.0504 (1.03 to 1.07)                | 2.48E-09 | 1.0690 (1.02 to 1.12)               | 2.61E-03 | 1.1043 (1.06 to 1.15)               | 5.25E-07 |
| Gender (male vs female) | 1.2983 (0.90 to 1.87)                | 1.62E-01 | 1.4097 (0.83 to 2.34)               | 2.01E-01 | 1.1780 (0.69 to 2.02)               | 5.53E-01 |
| Histology (OA vs A)     | 0.8814 (0.54 to 1.43)                | 6.08E-01 | 1.0372 (0.54 to 2.00)               | 9.14E-01 | 0.7704 (0.36 to 1.66)               | 5.06E-01 |
| Histology (OD vs A)     | 0.5913 (0.38 to 0.92)                | 1.89E-02 | 0.7190 (0.38 to 1.35)               | 3.04E-01 | 0.5742 (0.31 to 1.08)               | 8.39E-02 |
| Tumor Grade ( 3 vs 2)   | 2.1370 (1.40 to 3.25)                | 3.98E-04 | 1.6975 (0.98 to 2.94)               | 5.95E-02 | 3.5345 (1.59 to 7.85)               | 1.91E-03 |
| MGMT unmethy. vs methy. | 1.8200 (1.20 to 2.76)                | 4.77E-03 | 1.8554 (0.96 to 3.60)               | 6.78E-02 | 1.8132 (0.96 to 3.43)               | 6.70E-02 |

**Table S8F.** *SHOX2* and *TERT* mutation comparison: The multivariate Cox proportional-hazards models analyses for LGG patients (TCGA LGG dataset).

| Variable                | Cases of all age (n=292, events=74) |          | Cases of age <48 (n=187, events=37) |          | Cases of age ≥48 (n=105, events=37) |          |
|-------------------------|-------------------------------------|----------|-------------------------------------|----------|-------------------------------------|----------|
|                         | Hazard ratio (95% CI)               | p value  | Hazard ratio (95% CI)               | p value  | Hazard ratio (95% CI)               | p value  |
| SHOX2 High vs Low       | 2.9859 (1.63 to 5.46)               | 3.85E-04 | 3.1961 (1.20 to 8.54)               | 2.05E-02 | 2.6255 (1.20 to 5.46)               | 3.89E-02 |
| Age                     | 1.0627 (1.04 to 1.09)               | 6.31E-09 | 1.1580 (1.08 to 1.24)               | 2.29E-05 | 1.1083 (1.08 to 1.24)               | 3.45E-04 |
| Gender (male vs female) | 0.9278 (0.57 to 1.52)               | 7.65E-01 | 1.0177 (0.46 to 2.28)               | 9.66E-01 | 0.8725 (0.46 to 2.28)               | 7.05E-01 |
| Histology (OA vs A)     | 0.7580 (0.41 to 1.42)               | 3.85E-01 | 1.1557 (0.45 to 2.96)               | 7.63E-01 | 0.7421 (0.45 to 2.96)               | 5.23E-01 |
| Histology (OD vs A)     | 0.5612 (0.30 to 1.05)               | 7.24E-02 | 0.9674 (0.34 to 2.74)               | 9.50E-01 | 0.4787 (0.34 to 2.74)               | 9.86E-02 |
| Tumor Grade ( 3 vs 2)   | 2.9555 (1.64 to 5.31)               | 2.94E-04 | 3.8623 (1.60 to 9.30)               | 2.58E-03 | 2.4265 (1.60 to 9.30)               | 9.75E-02 |
| TERT promoter wt vs mut | 1.0876 (0.59 to 2.01)               | 7.89E-01 | 2.5300 (1.05 to 6.09)               | 3.84E-02 | 0.4577 (1.05 to 6.09)               | 1.41E-01 |

**Table S8G.** *SHOX2* and *TERT* expression comparison: The multivariate Cox proportional-hazards models analyses for LGG patients (TCGA LGG dataset).

| Variable          | Cases of all age (n=292, events=74) |          | Cases of age <48 (n=329, events=66) |          | Cases of age ≥48 (n=183, events=60) |          |
|-------------------|-------------------------------------|----------|-------------------------------------|----------|-------------------------------------|----------|
|                   | Hazard ratio (95% CI)               | p value  | Hazard ratio (95% CI)               | p value  | Hazard ratio (95% CI)               | p value  |
| SHOX2 High vs Low | 3.3368 (2.20 to 5.06)               | 1.31E-08 | 4.1038 (2.02 to 8.32)               | 9.11E-05 | 3.6142 (1.95 to 6.68)               | 4.19E-05 |

|                                |                       |          |                       |          |                       |          |
|--------------------------------|-----------------------|----------|-----------------------|----------|-----------------------|----------|
| Age                            | 1.0516 (1.03 to 1.07) | 1.40E-09 | 1.0745 (1.03 to 1.12) | 1.07E-03 | 1.1065 (1.07 to 1.15) | 1.53E-07 |
| Gender (male vs female)        | 1.2941 (0.90 to 1.87) | 1.69E-01 | 1.4630 (0.86 to 2.50) | 1.64E-01 | 1.1458 (0.67 to 1.96) | 6.20E-01 |
| Histology (OA vs A)            | 0.8252 (0.51 to 1.34) | 4.34E-01 | 0.9609 (0.51 to 1.81) | 9.02E-01 | 0.7483 (0.34 to 1.63) | 4.64E-01 |
| Histology (OD vs A)            | 0.5095 (0.31 to 0.83) | 6.29E-03 | 1.1168 (0.54 to 2.33) | 7.68E-01 | 0.4025 (0.21 to 0.77) | 6.26E-03 |
| Tumor Grade ( 3 vs 2)          | 2.2292 (1.46 to 3.40) | 2.03E-04 | 1.8227 (1.06 to 3.12) | 2.90E-02 | 3.0542 (1.37 to 6.79) | 6.19E-03 |
| TER Not_Expressed vs Expressed | 0.9363 (0.61 to 1.44) | 7.63E-01 | 2.5675 (1.19 to 5.52) | 1.58E-02 | 0.5064 (0.26 to 0.97) | 4.01E-02 |

**Table S8H.** *SHOX2* and *NES* comparison: The multivariate Cox proportional-hazards models analyses for LGG patients (TCGA LGG dataset).

| Variable                 | Cases of all age (n=515, events=126) |          | Cases of age <48 (n=331, events=66) |          | Cases of age ≥48 (n=184, events=60) |          |
|--------------------------|--------------------------------------|----------|-------------------------------------|----------|-------------------------------------|----------|
|                          | Hazard ratio (95% CI)                | p value  | Hazard ratio (95% CI)               | p value  | Hazard ratio (95% CI)               | p value  |
| <i>SHOX2</i> High vs Low | 3.3979 (2.25 to 5.14)                | 7.21E-09 | 3.0712 (1.56 to 6.05)               | 1.17E-03 | 3.6424 (1.99 to 6.66)               | 2.74E-05 |
| Age                      | 1.0529 (1.04 to 1.07)                | 6.52E-10 | 1.0597 (1.02 to 1.11)               | 7.02E-03 | 1.1086 (1.07 to 1.15)               | 1.01E-07 |
| Gender (male vs female)  | 1.2649 (0.88 to 1.83)                | 2.10E-01 | 1.3066 (0.77 to 2.21)               | 3.17E-01 | 1.1468 (0.66 to 1.99)               | 6.27E-01 |
| Histology (OA vs A)      | 0.8752 (0.54 to 1.42)                | 5.91E-01 | 0.9368 (0.49 to 1.78)               | 8.43E-01 | 0.7958 (0.37 to 1.73)               | 5.63E-01 |
| Histology (OD vs A)      | 0.5416 (0.35 to 0.84)                | 5.56E-03 | 0.6645 (0.36 to 1.24)               | 2.01E-01 | 0.5061 (0.27 to 0.94)               | 3.07E-02 |
| Tumor Grade ( 3 vs 2)    | 2.1971 (1.44 to 3.35)                | 2.50E-04 | 1.8311 (1.07 to 3.15)               | 2.85E-02 | 3.3308 (1.50 to 7.41)               | 3.16E-03 |
| <i>NES</i> High vs Low   | 1.3386 (0.93 to 1.93)                | 1.19E-01 | 1.1219 (0.68 to 1.85)               | 6.54E-01 | 1.4210 (0.80 to 2.54)               | 2.35E-01 |

**Table S8I.** *SHOX2* and *ATRX* comparison: The multivariate Cox proportional-hazards models analyses for LGG patients (TCGA LGG dataset).

| Variable                 | Cases of all age (n=512, events=124) |          | Cases of age <48 (n=329, events=65) |          | Cases of age ≥48 (n=183, events=59) |          |
|--------------------------|--------------------------------------|----------|-------------------------------------|----------|-------------------------------------|----------|
|                          | Hazard ratio (95% CI)                | p value  | Hazard ratio (95% CI)               | p value  | Hazard ratio (95% CI)               | p value  |
| <i>SHOX2</i> High vs Low | 3.9068 (2.50 to 6.10)                | 2.06E-09 | 3.3023 (1.65 to 6.60)               | 7.16E-04 | 4.0282 (2.04 to 7.95)               | 5.89E-05 |
| Age                      | 1.0551 (1.04 to 1.07)                | 1.62E-10 | 1.0663 (1.02 to 1.11)               | 3.36E-03 | 1.1079 (1.07 to 1.15)               | 1.65E-07 |
| Gender (male vs female)  | 1.3780 (0.95 to 2.01)                | 9.50E-02 | 1.3078 (0.77 to 2.22)               | 3.22E-01 | 1.3034 (0.76 to 2.23)               | 3.35E-01 |
| Histology (OA vs A)      | 0.8320 (0.51 to 1.35)                | 4.55E-01 | 0.9207 (0.49 to 1.74)               | 8.00E-01 | 0.7642 (0.35 to 1.66)               | 4.99E-01 |
| Histology (OD vs A)      | 0.5613 (0.35 to 0.89)                | 1.48E-02 | 0.7762 (0.39 to 1.57)               | 4.81E-01 | 0.4759 (0.25 to 0.91)               | 2.48E-02 |
| Tumor Grade ( 3 vs 2)    | 1.9844 (1.30 to 3.04)                | 1.59E-03 | 1.7471 (1.01 to 3.03)               | 4.64E-02 | 2.7779 (1.24 to 6.22)               | 1.30E-02 |
| <i>ATRX</i> wt vs mut    | 0.9580 (0.61 to 1.51)                | 8.54E-01 | 0.7022 (0.38 to 1.30)               | 2.58E-01 | 1.7987 (0.72 to 4.47)               | 2.06E-01 |

Notes:

1. The cutoff value (48 years) was determined by mclust clustering analysis of age data in TCGA LGG dataset (see Section of Statistical analysis).
2. Hazard ratio for age variable: risk per 1 year. OA: oligoastrocytoma; A: astrocytoma; OD: oligodendroglioma.
3. The RNA-Seq expression data (cutoff value of 4.135 for *SHOX2* expression, cutoff value of 13.35 for *NES* expression) from TCGA LGG dataset were analyzed. See Appendix Tables S1 for lists of datasets and data source.
